# Supplementary material
Source: PubMed Central journal article supplement (PMC7185621)
Supplement: mmc1.pdf [file mmc1.pdf]

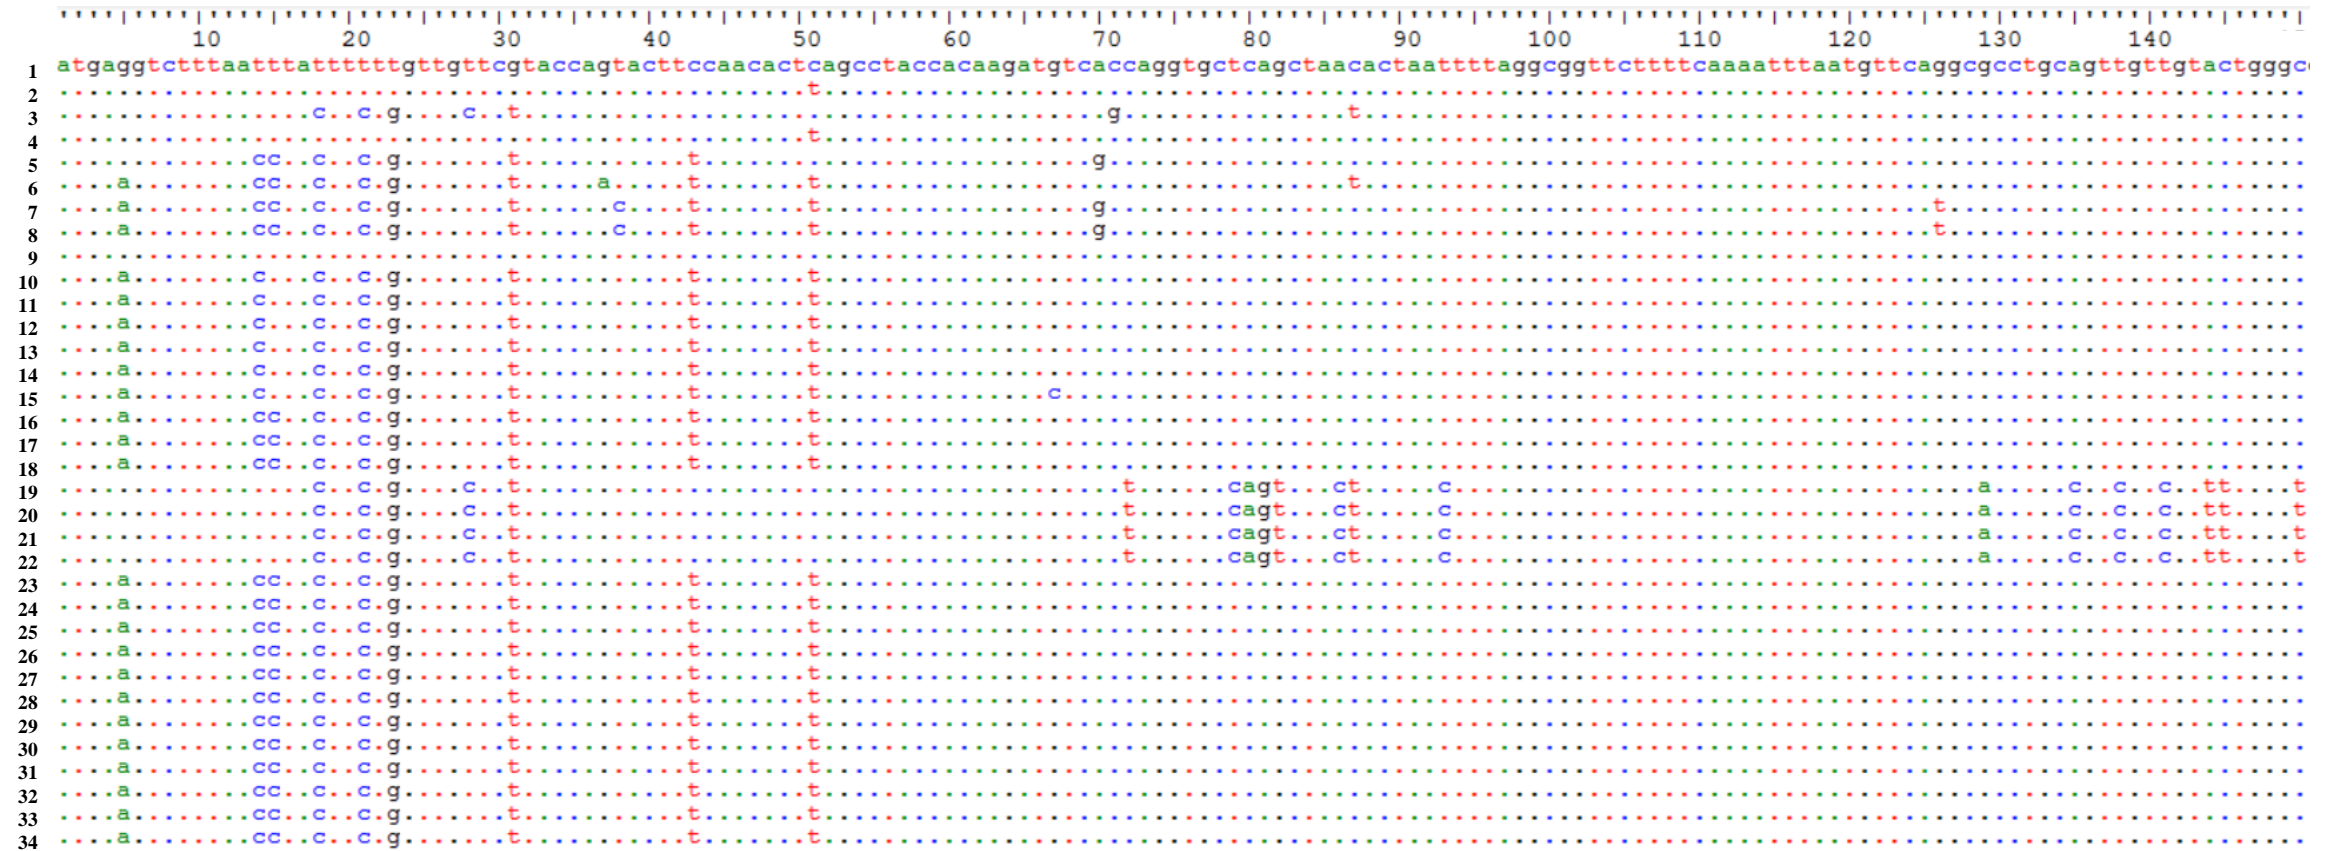

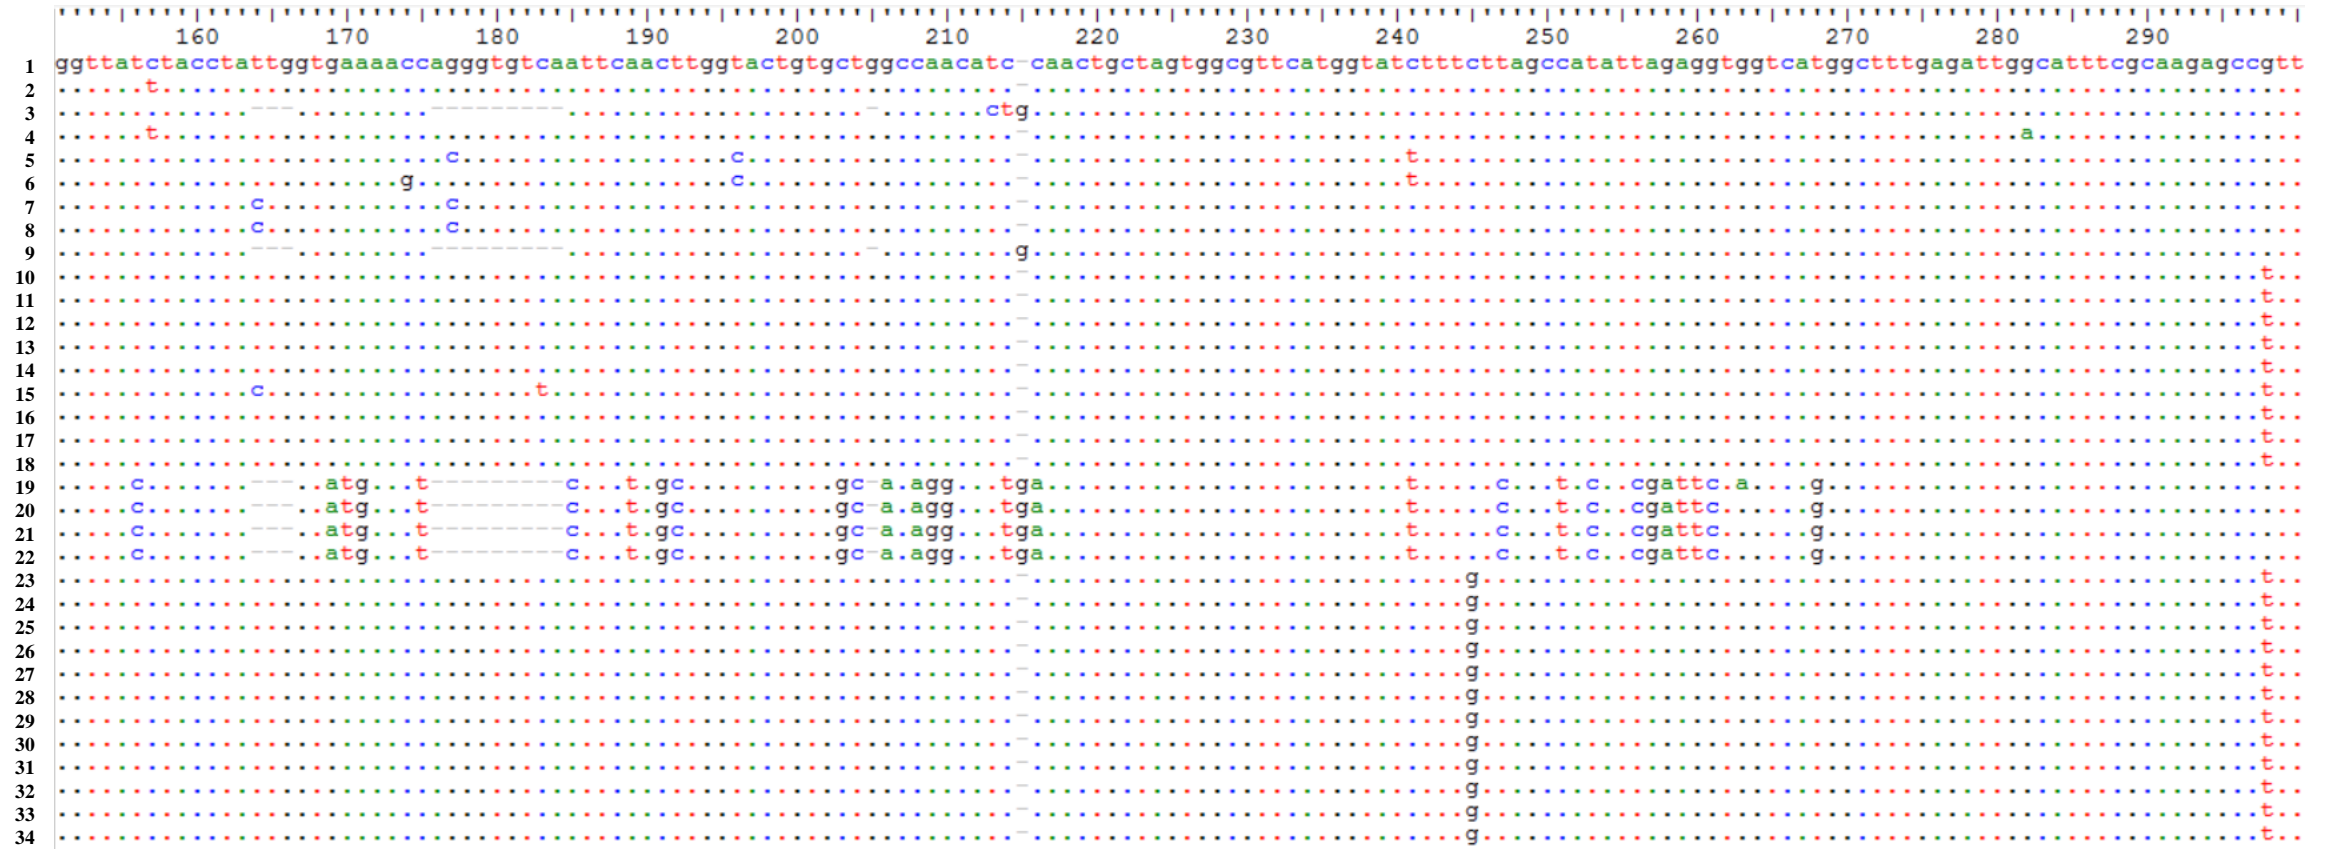

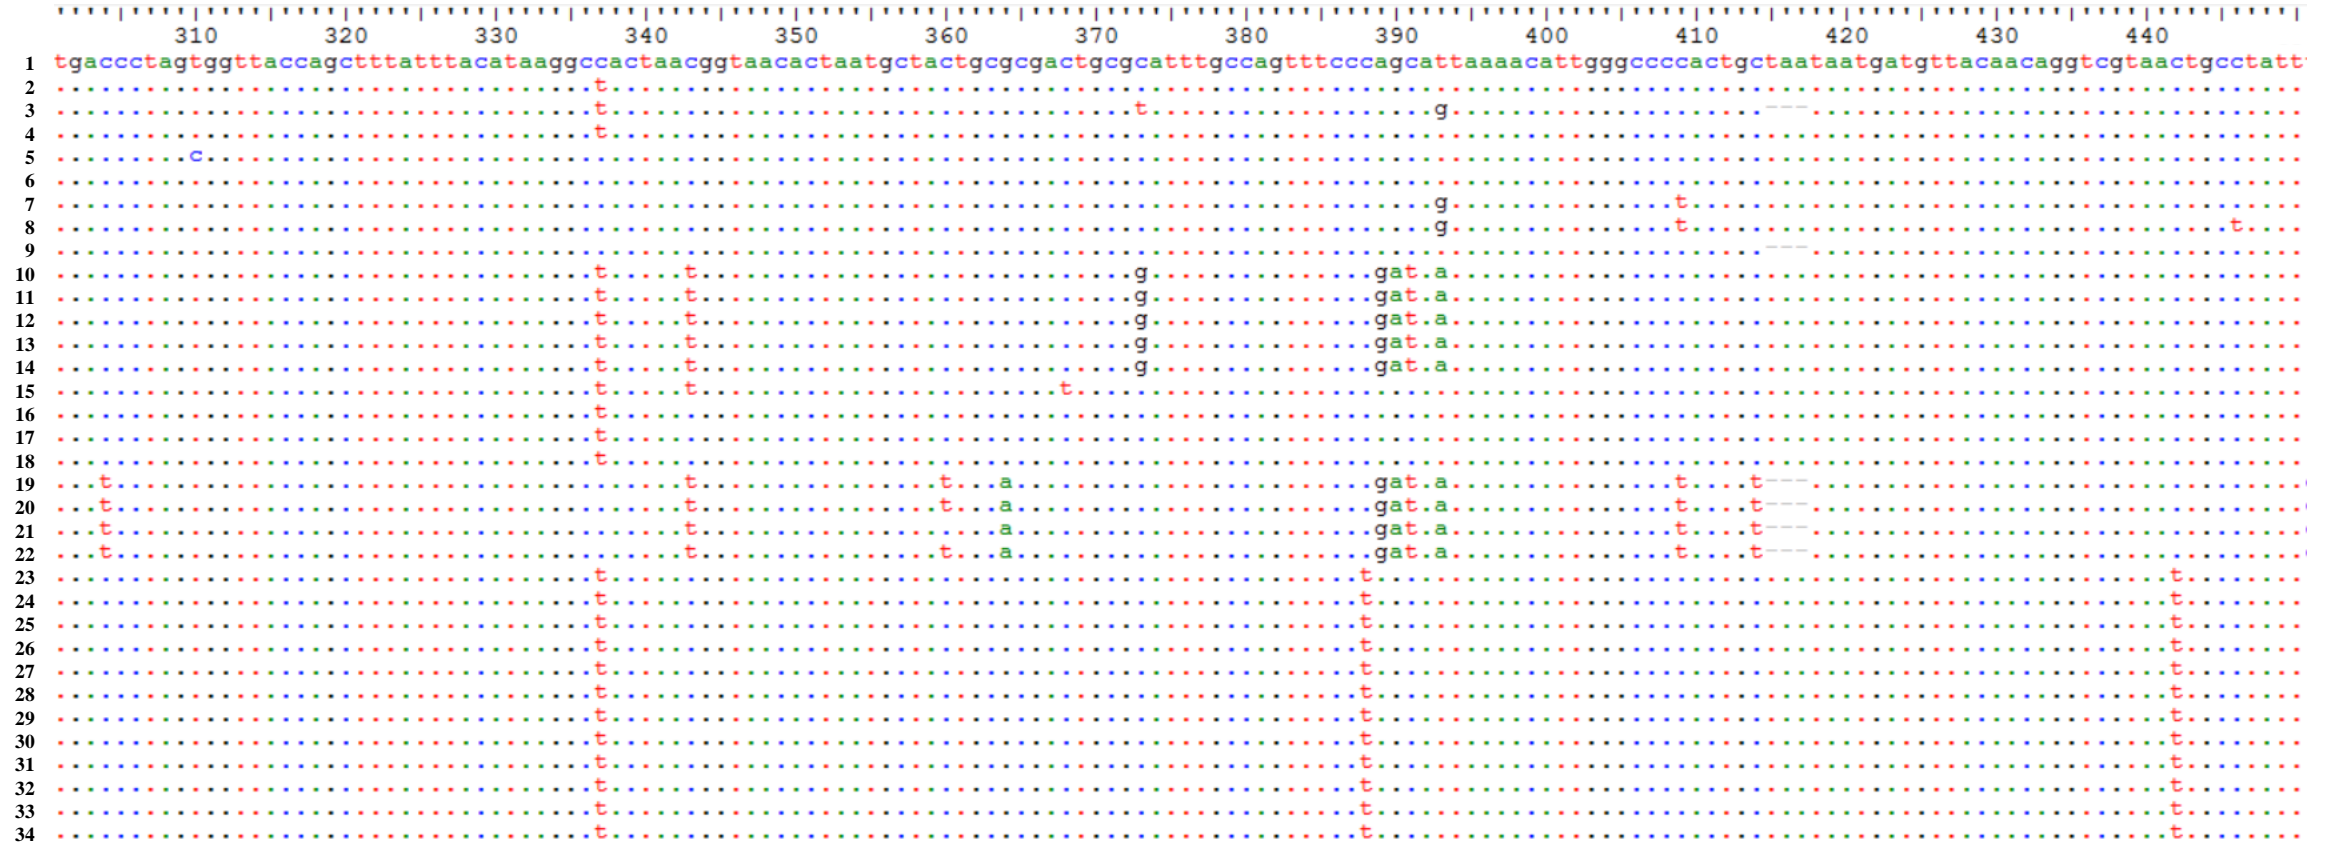

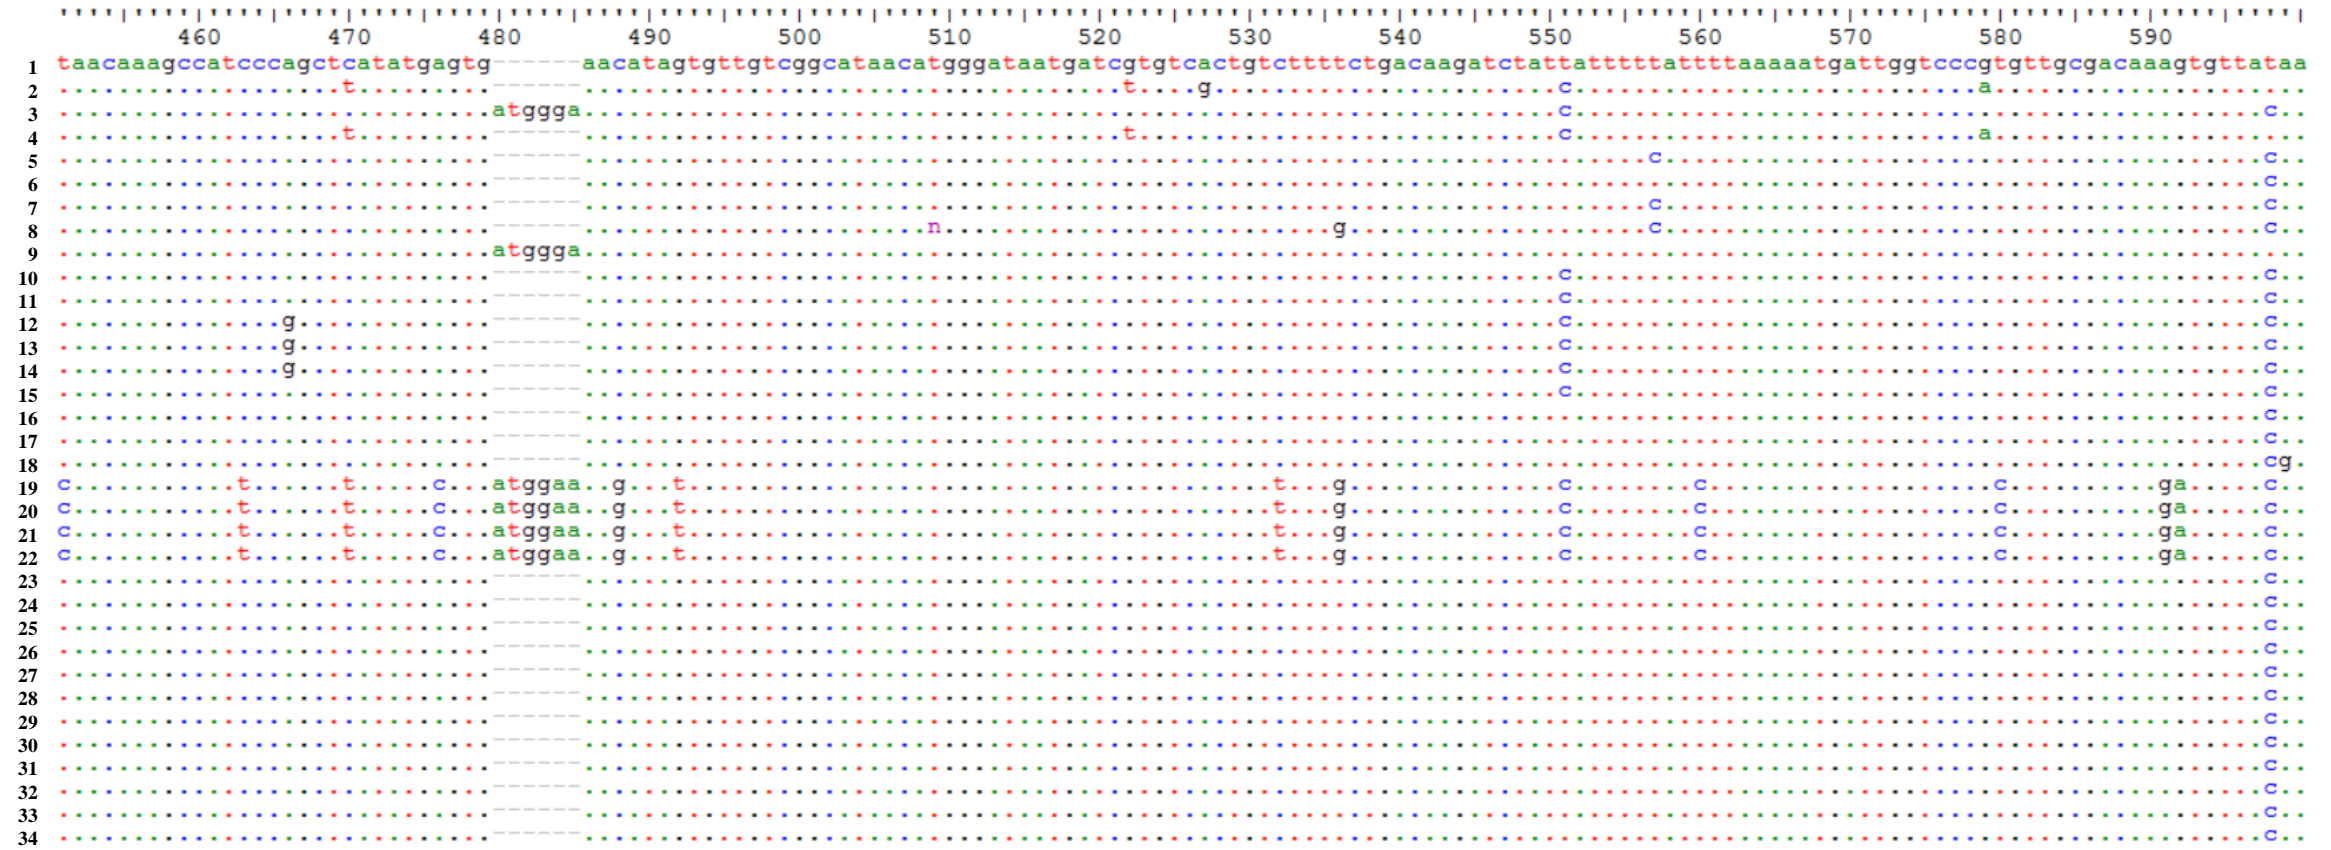

TH-S-INS

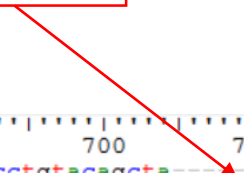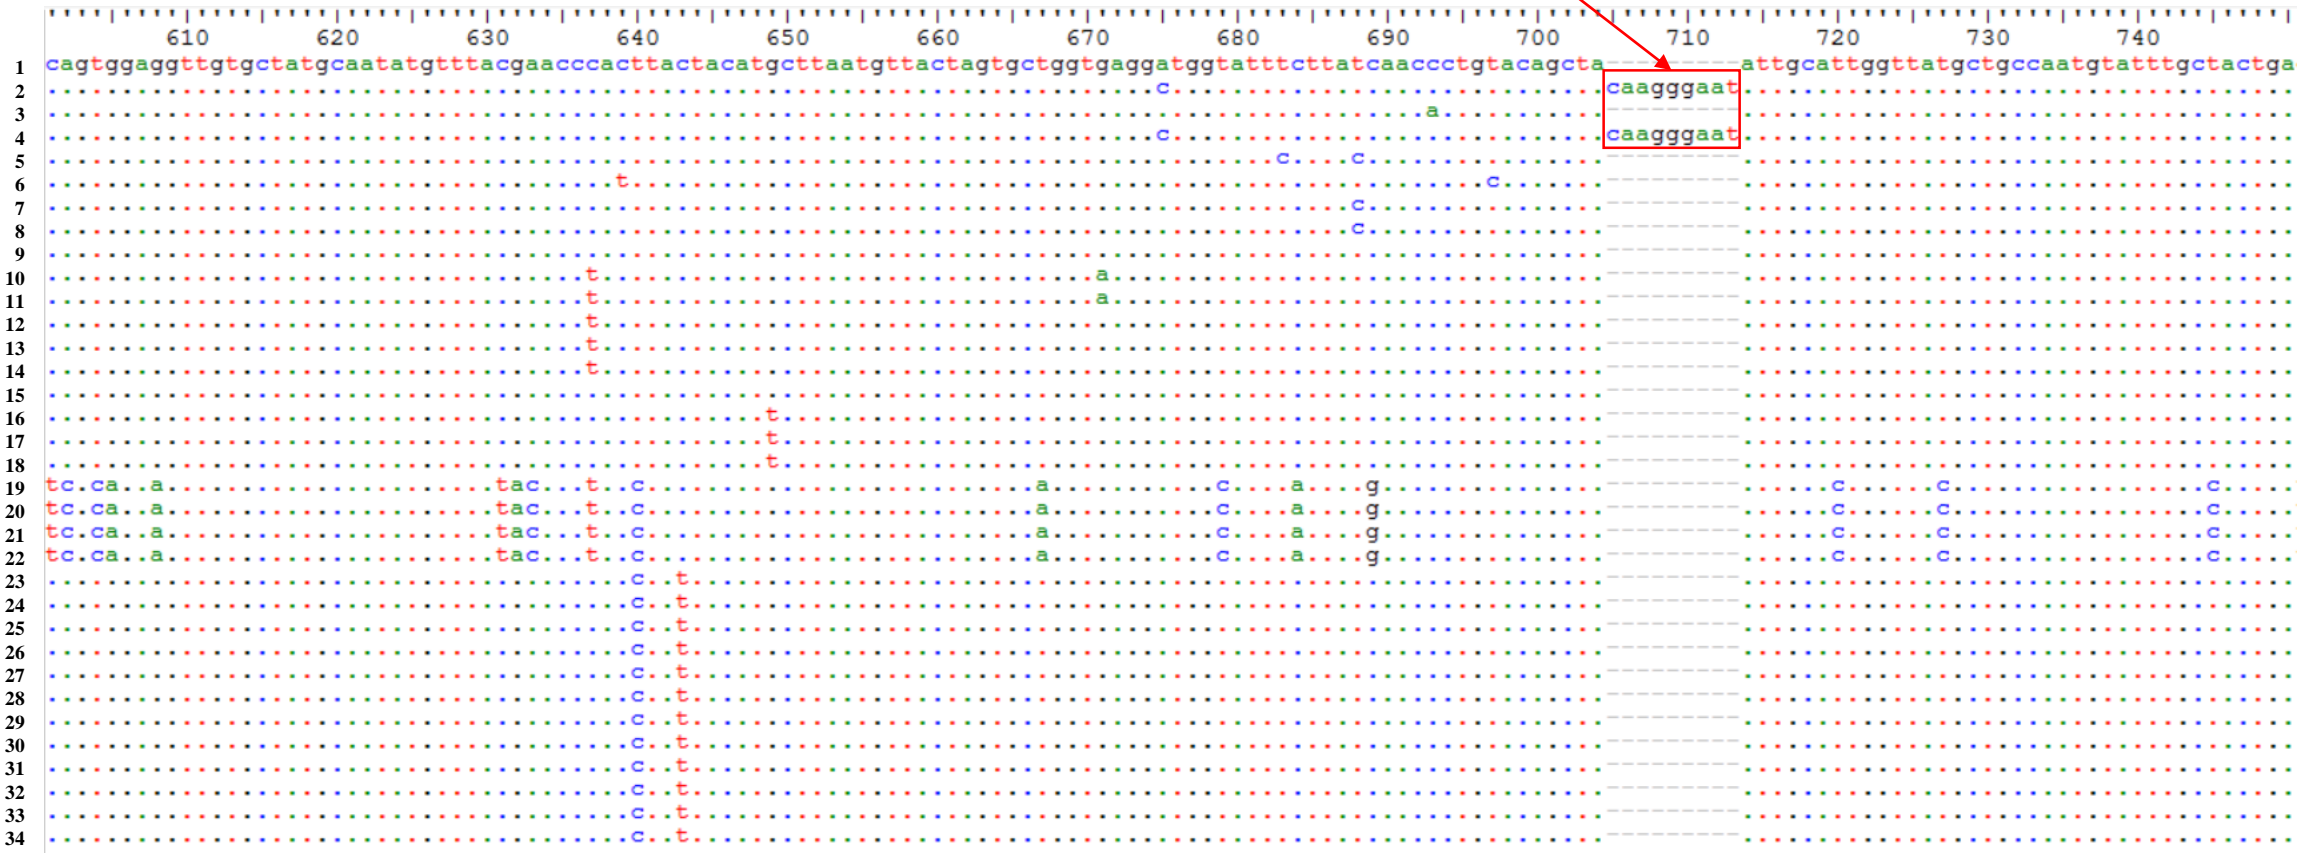



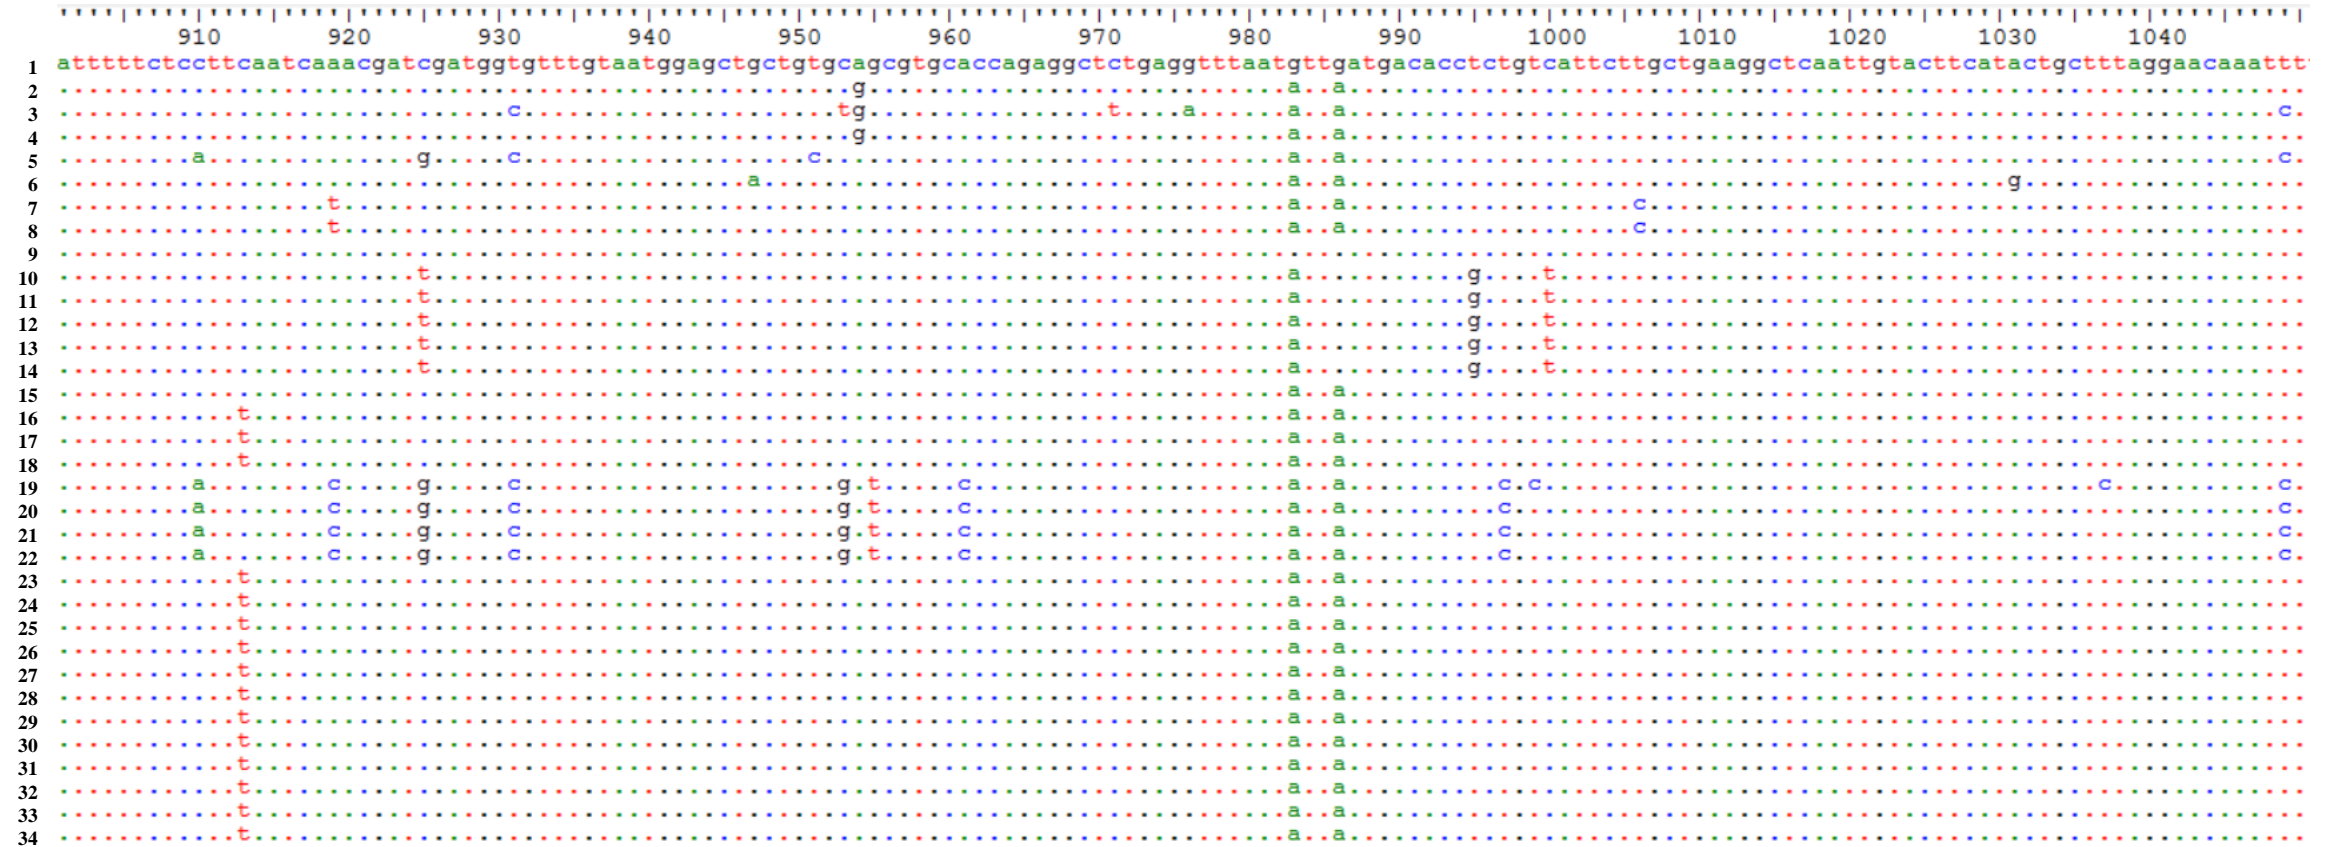

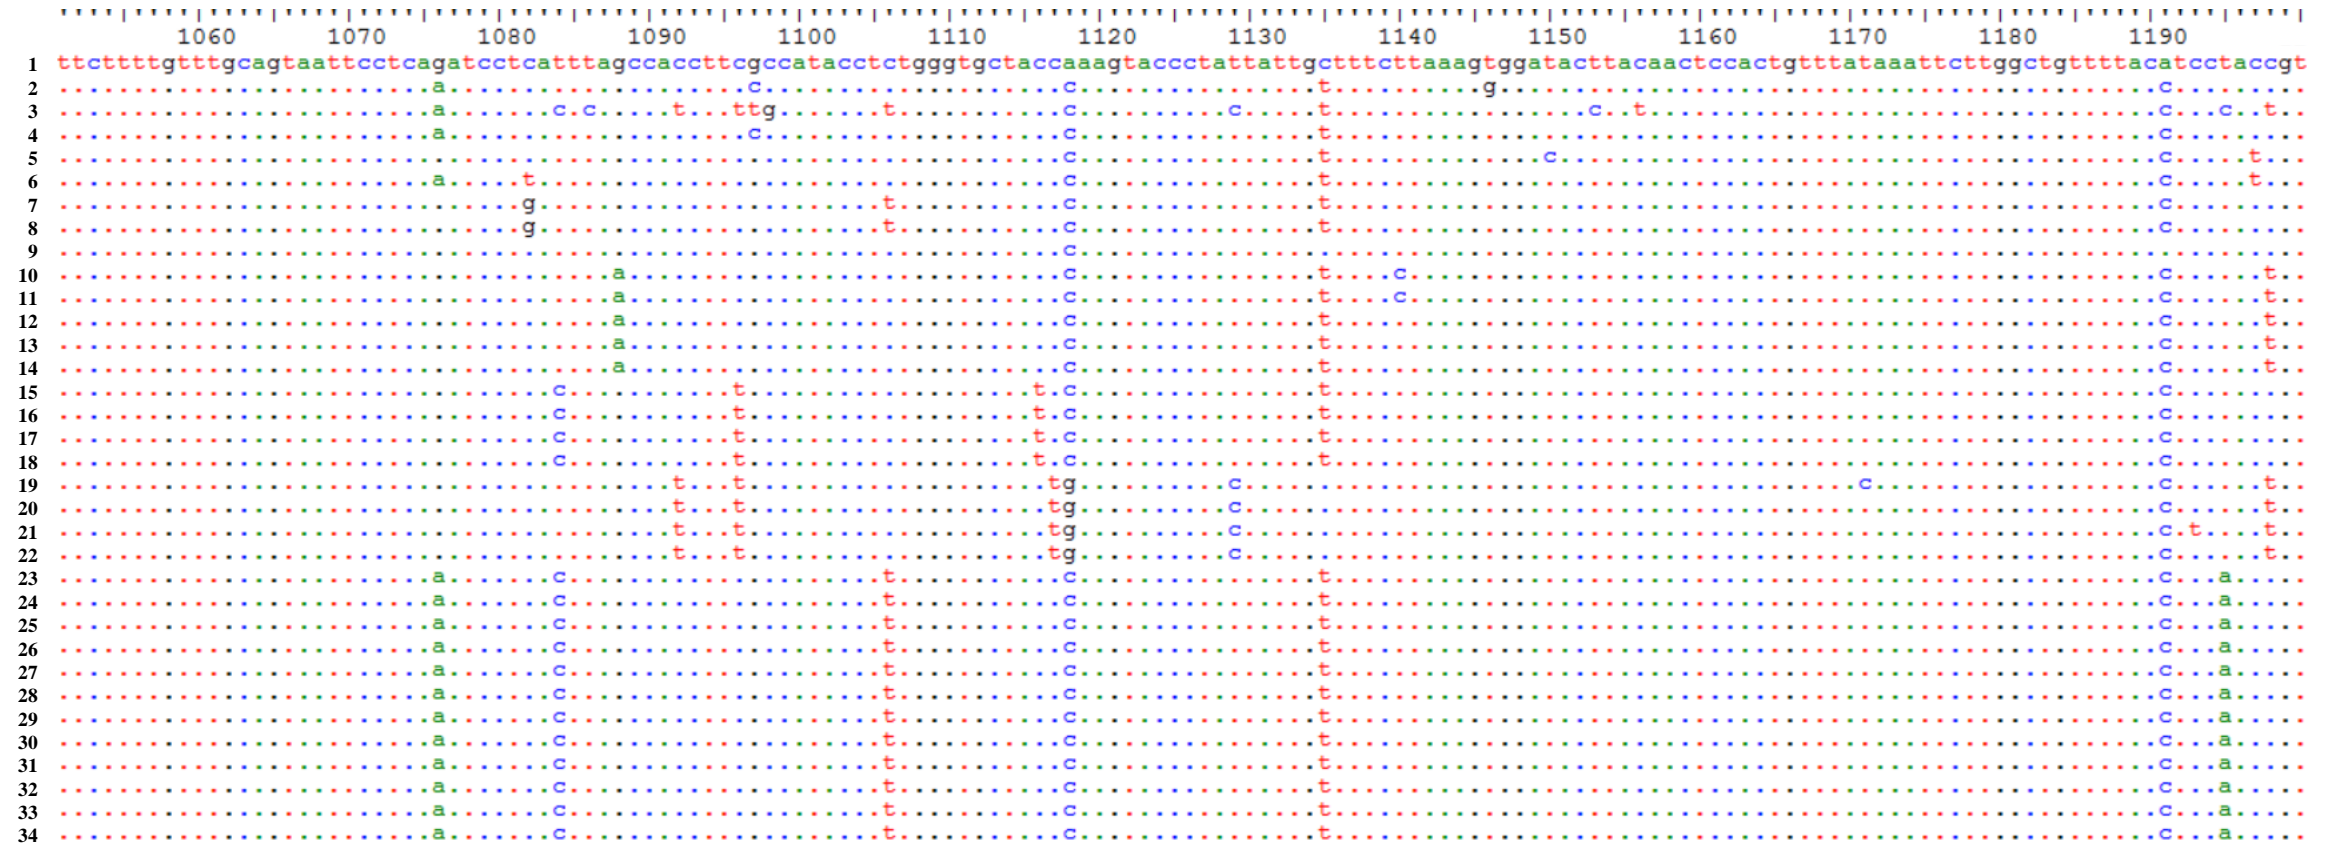



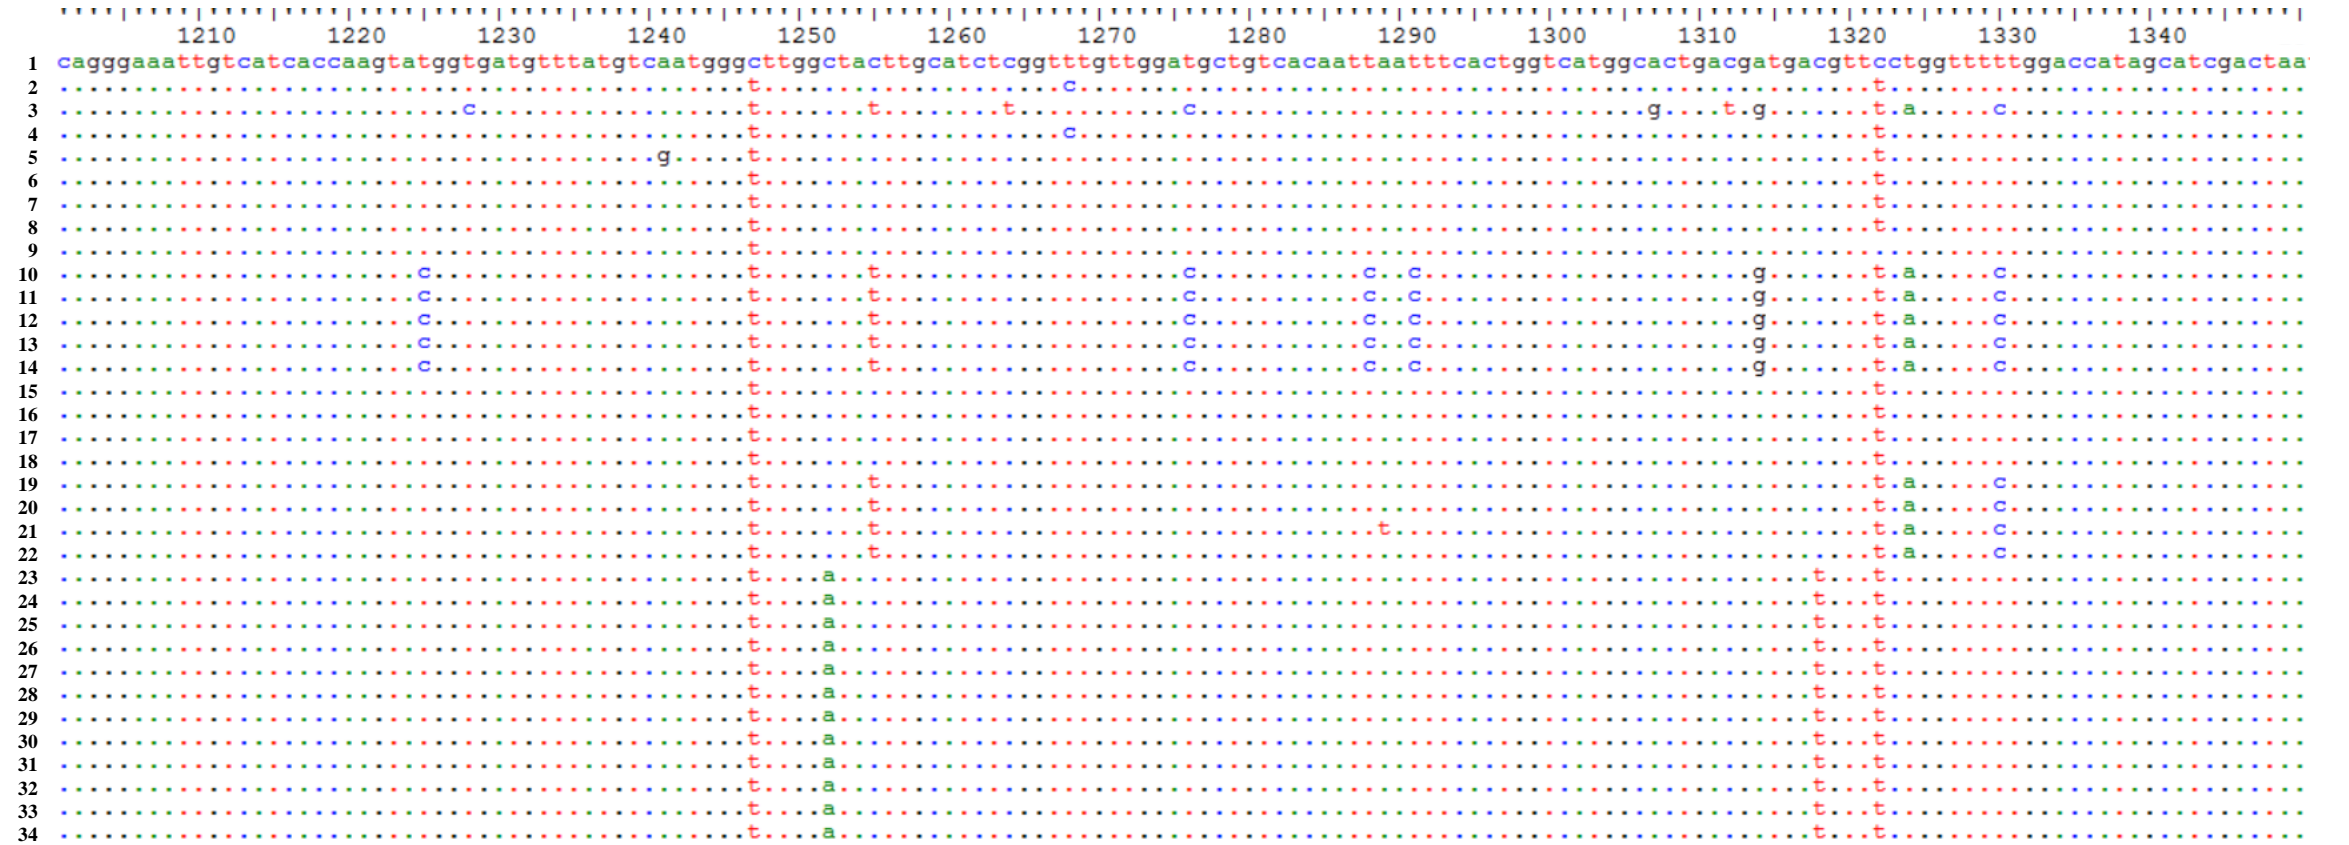

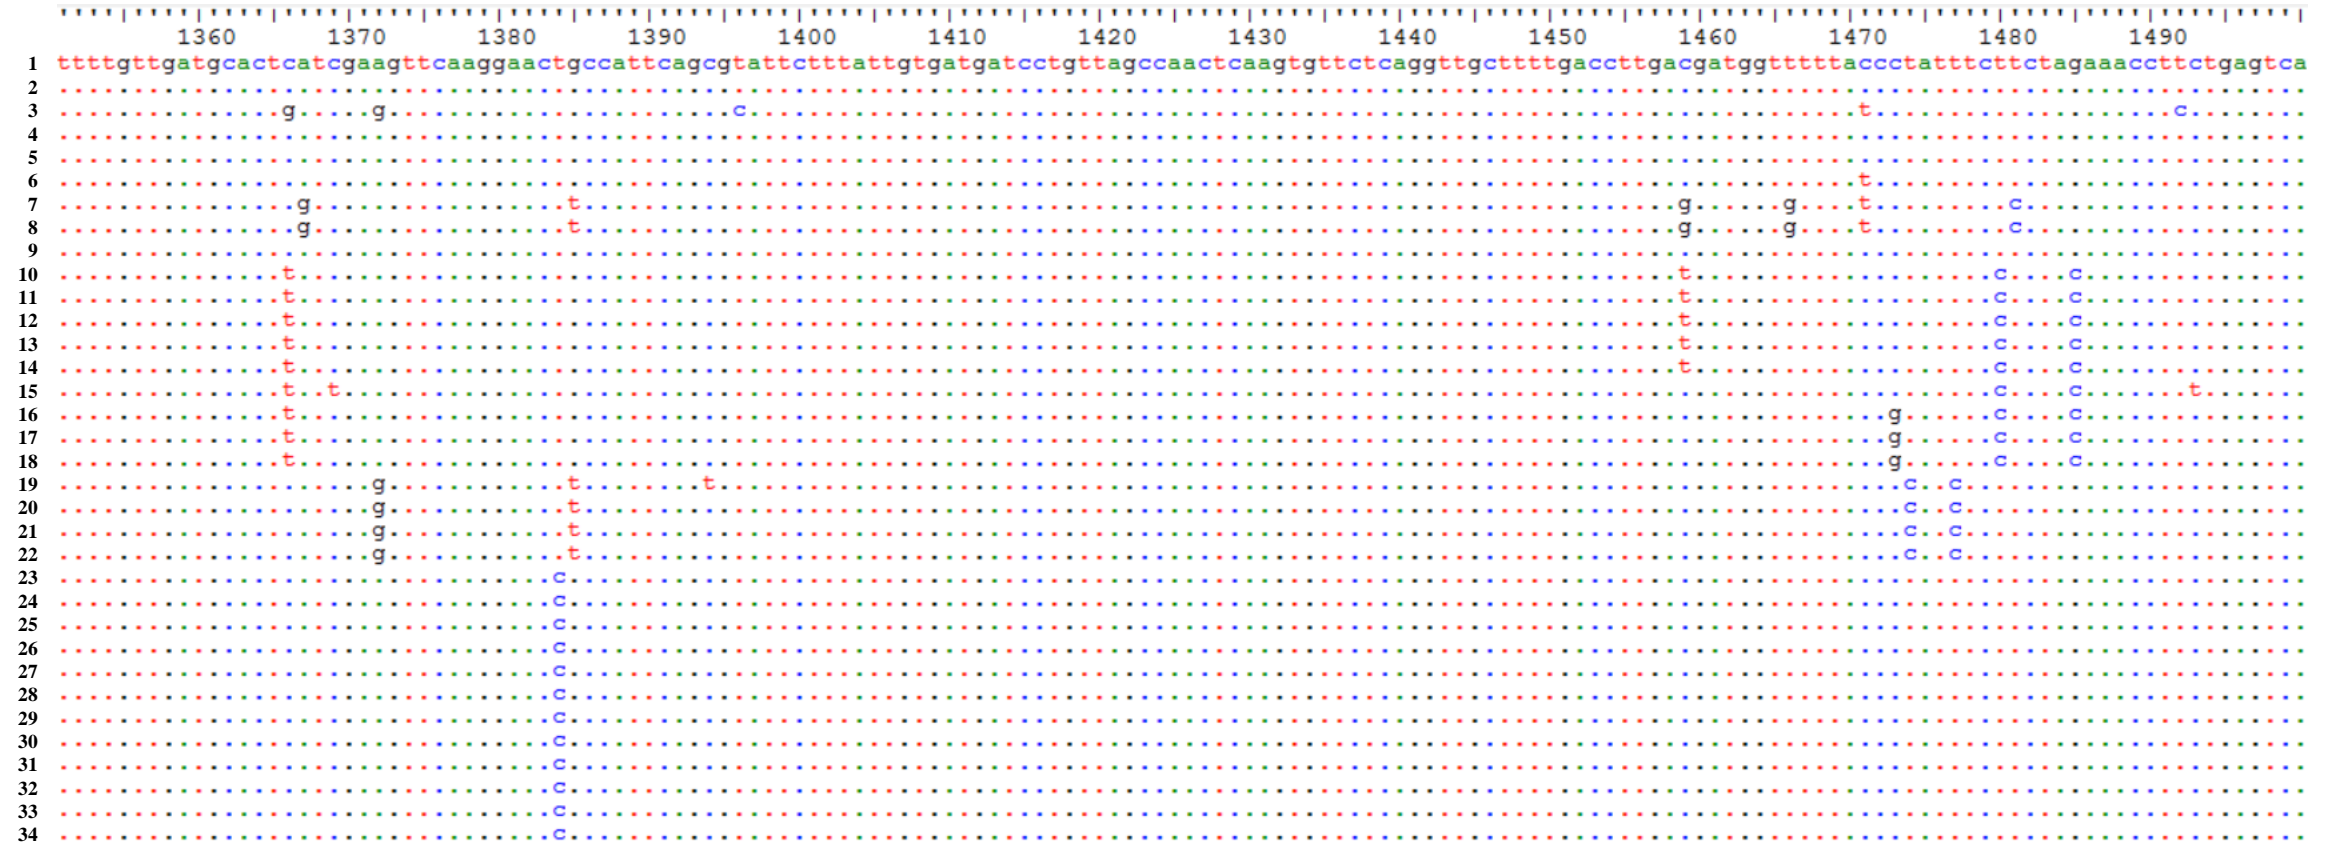

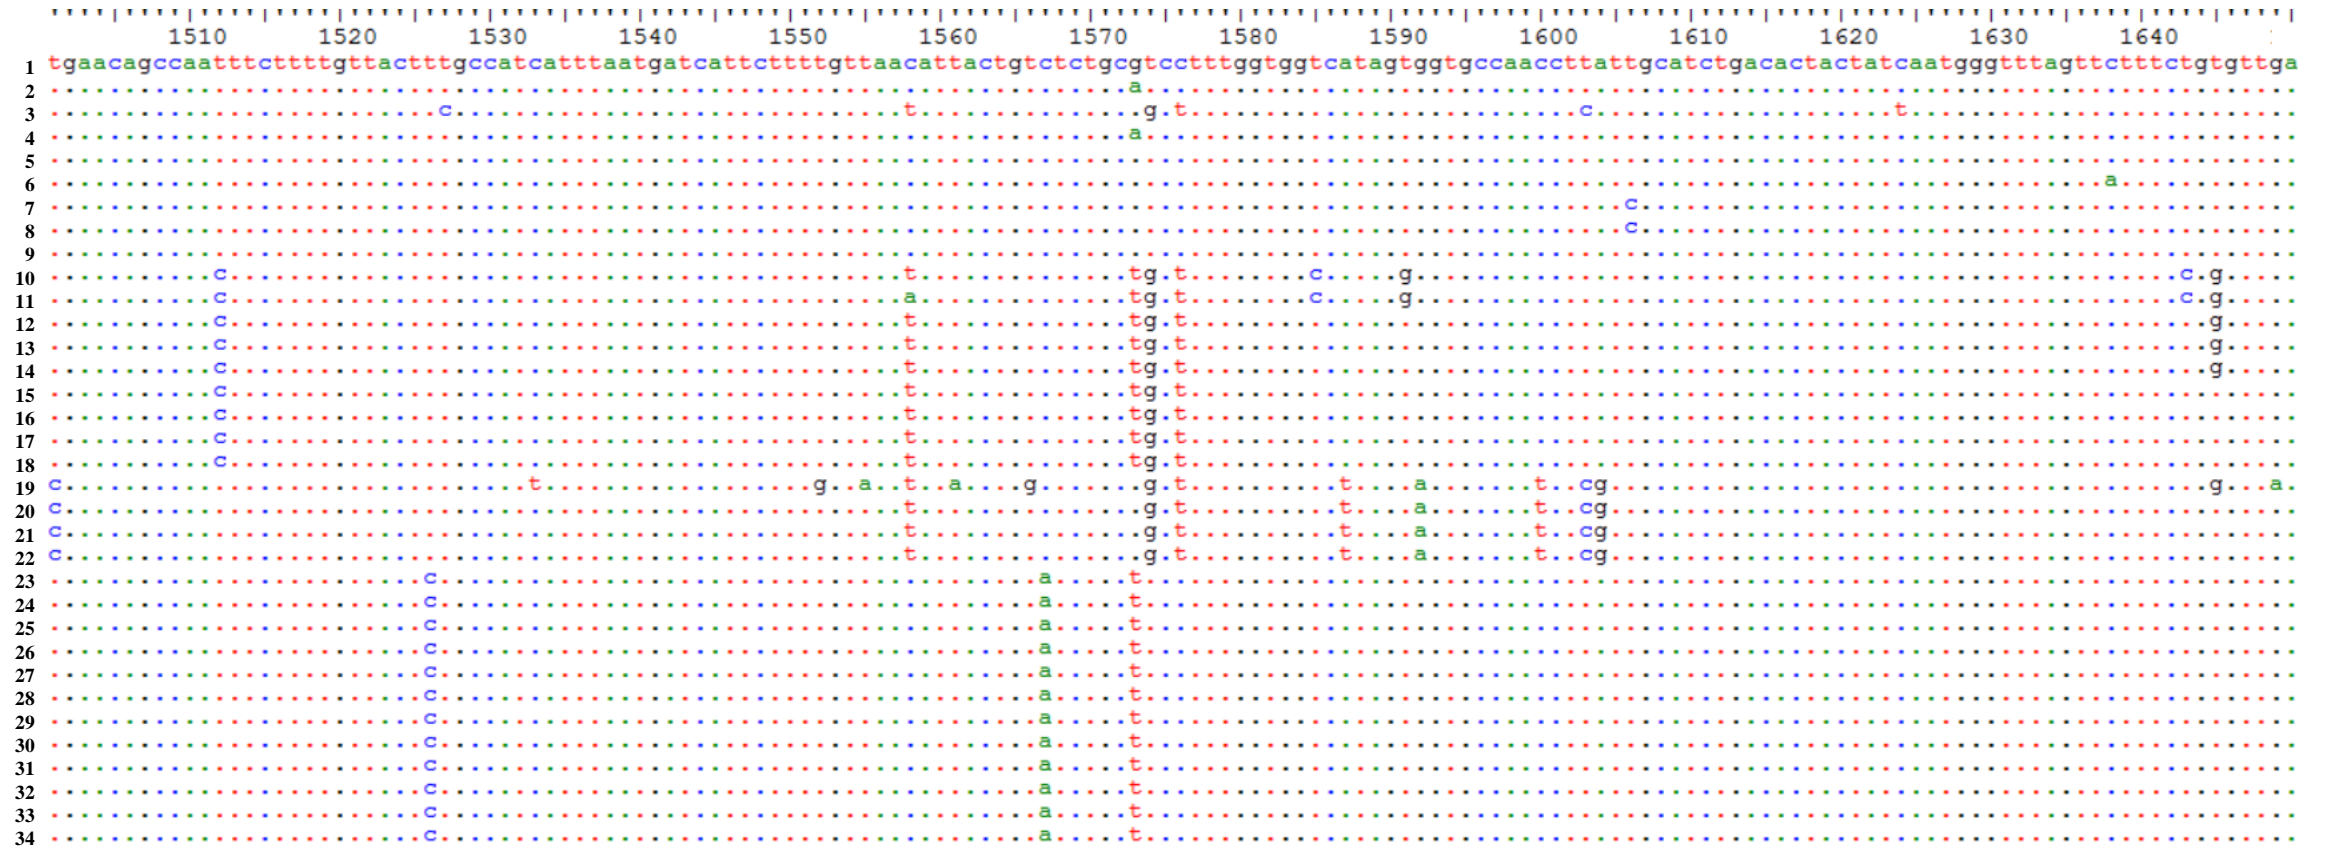

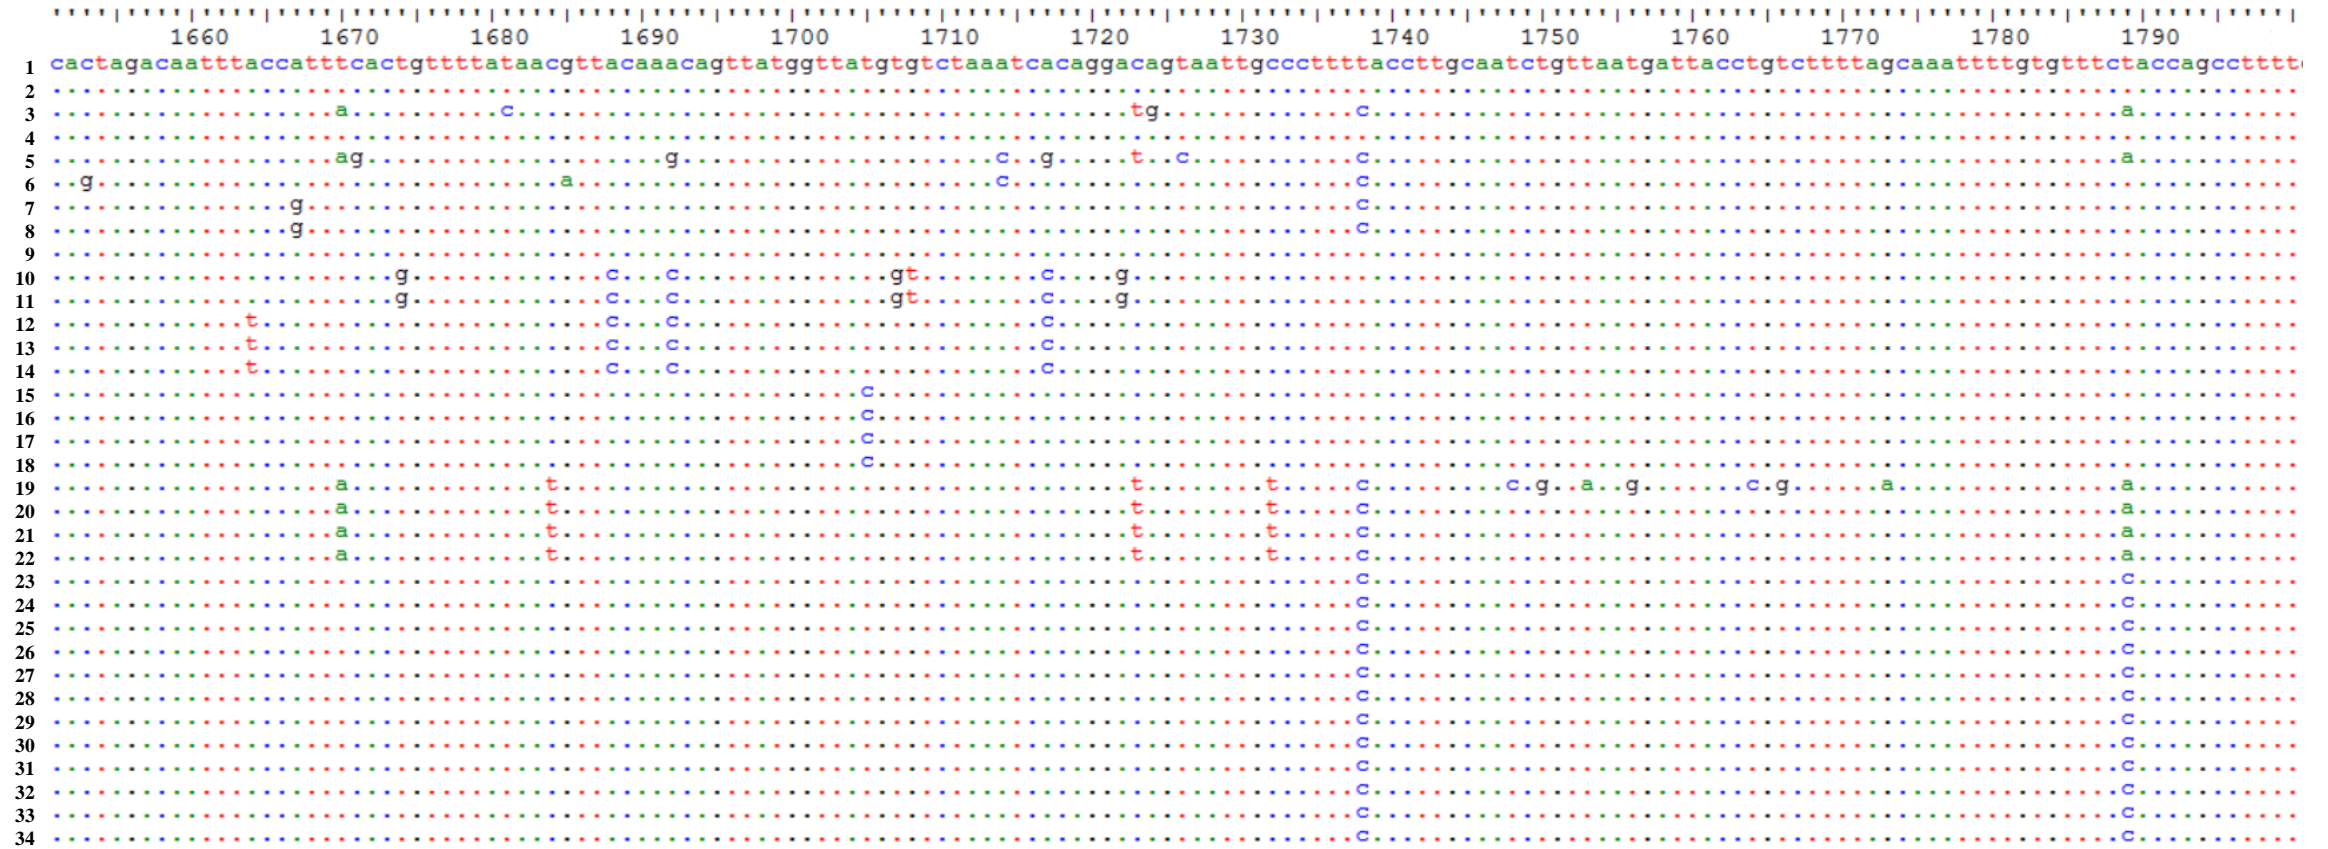

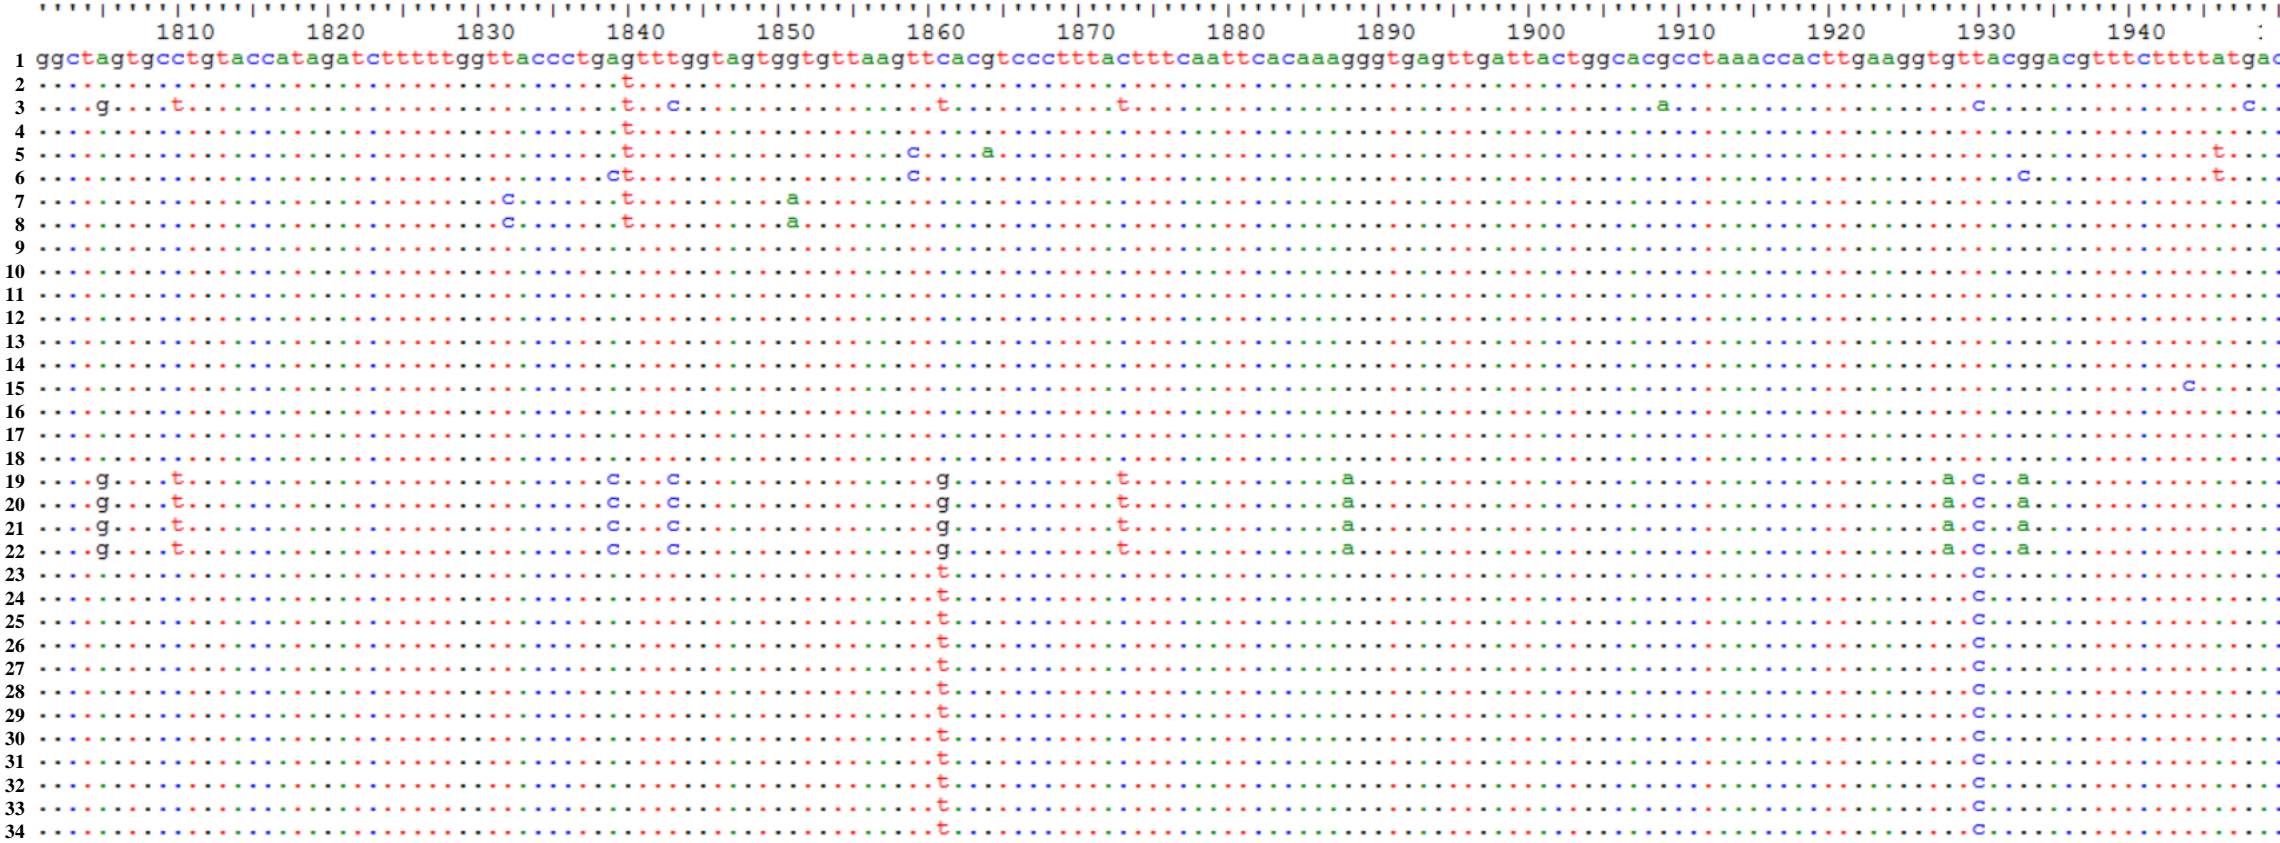

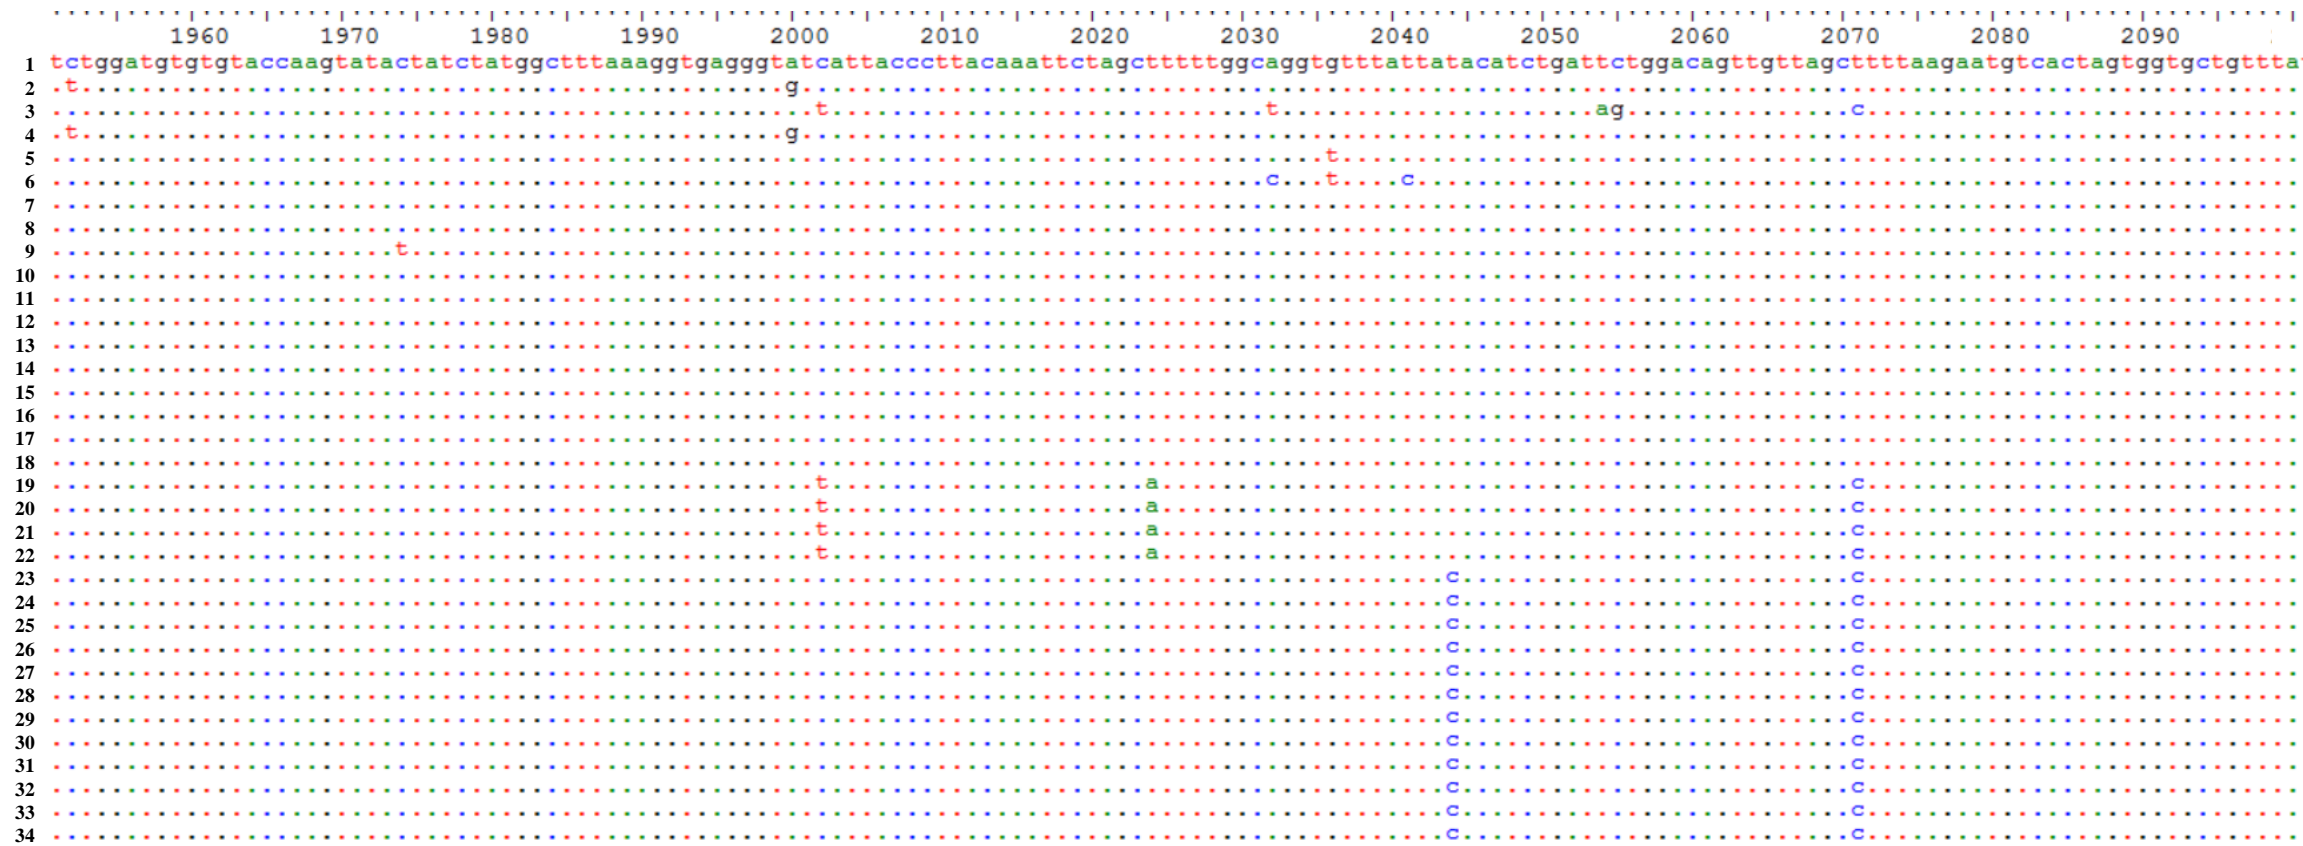

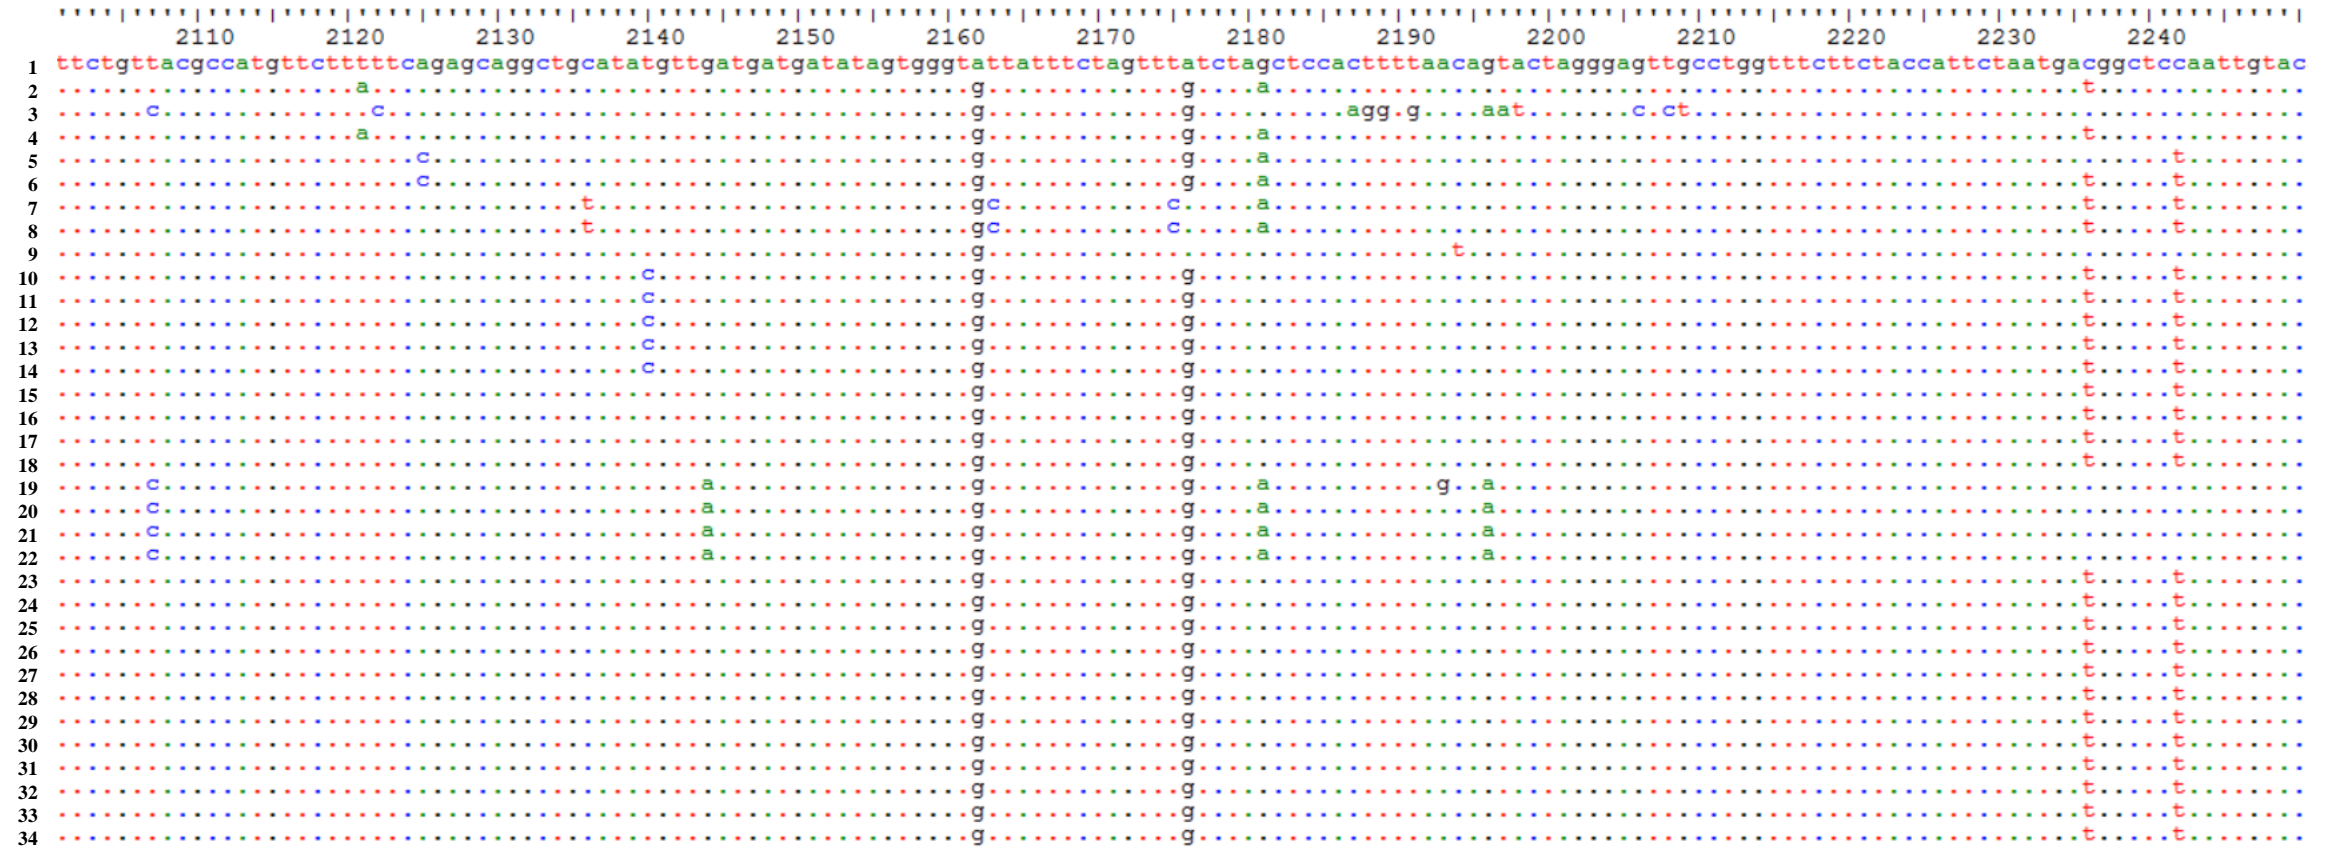

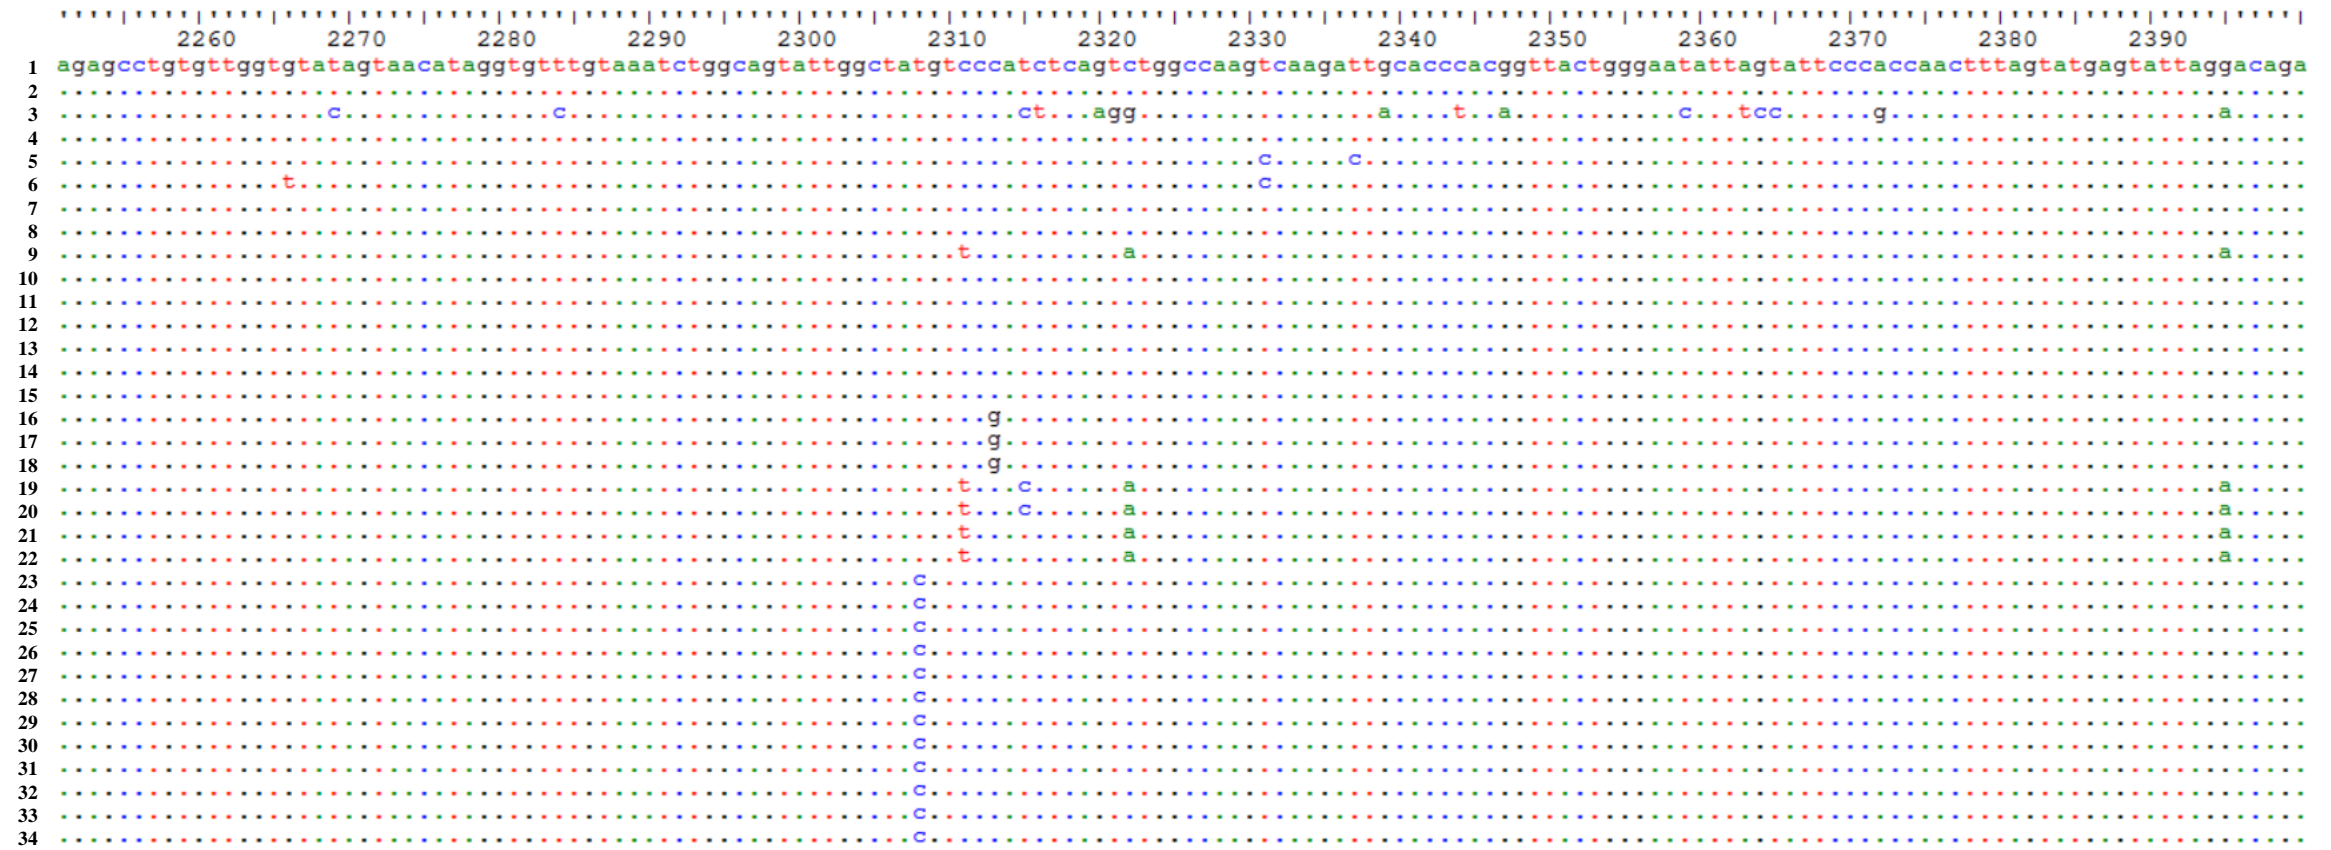



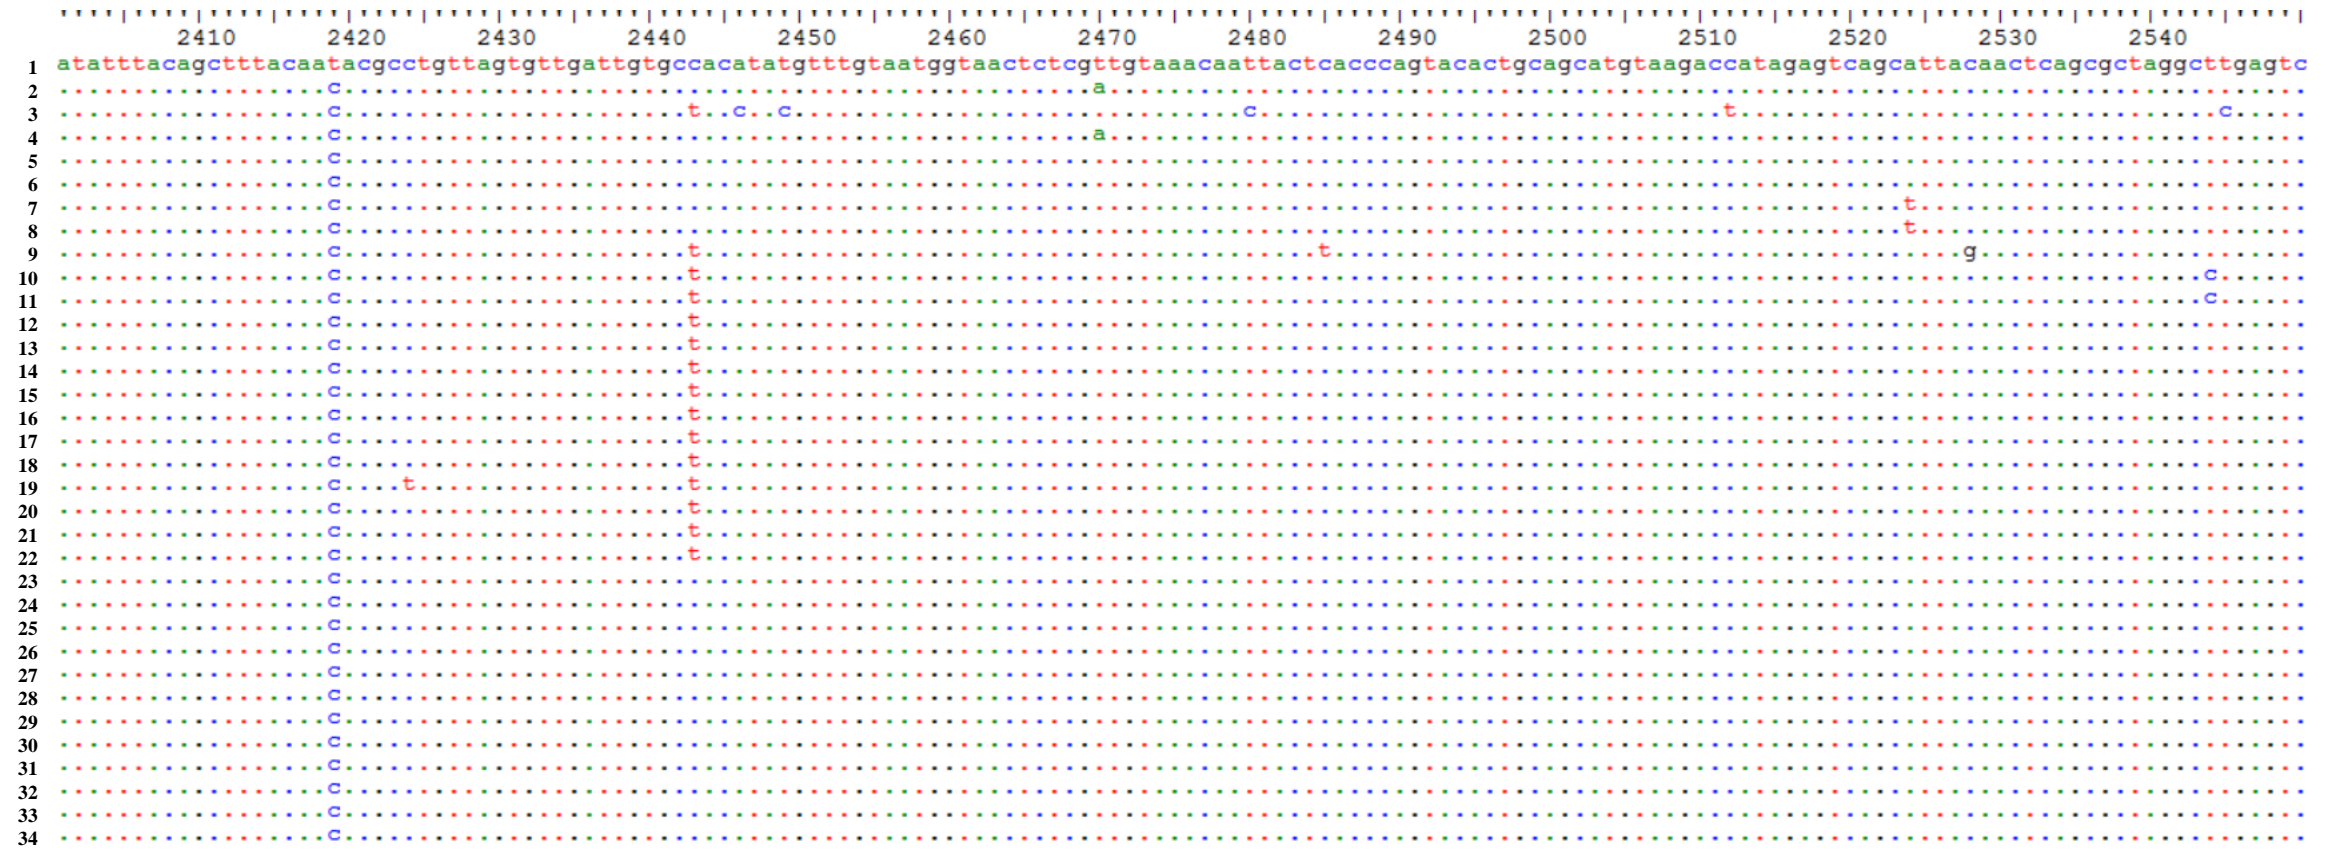



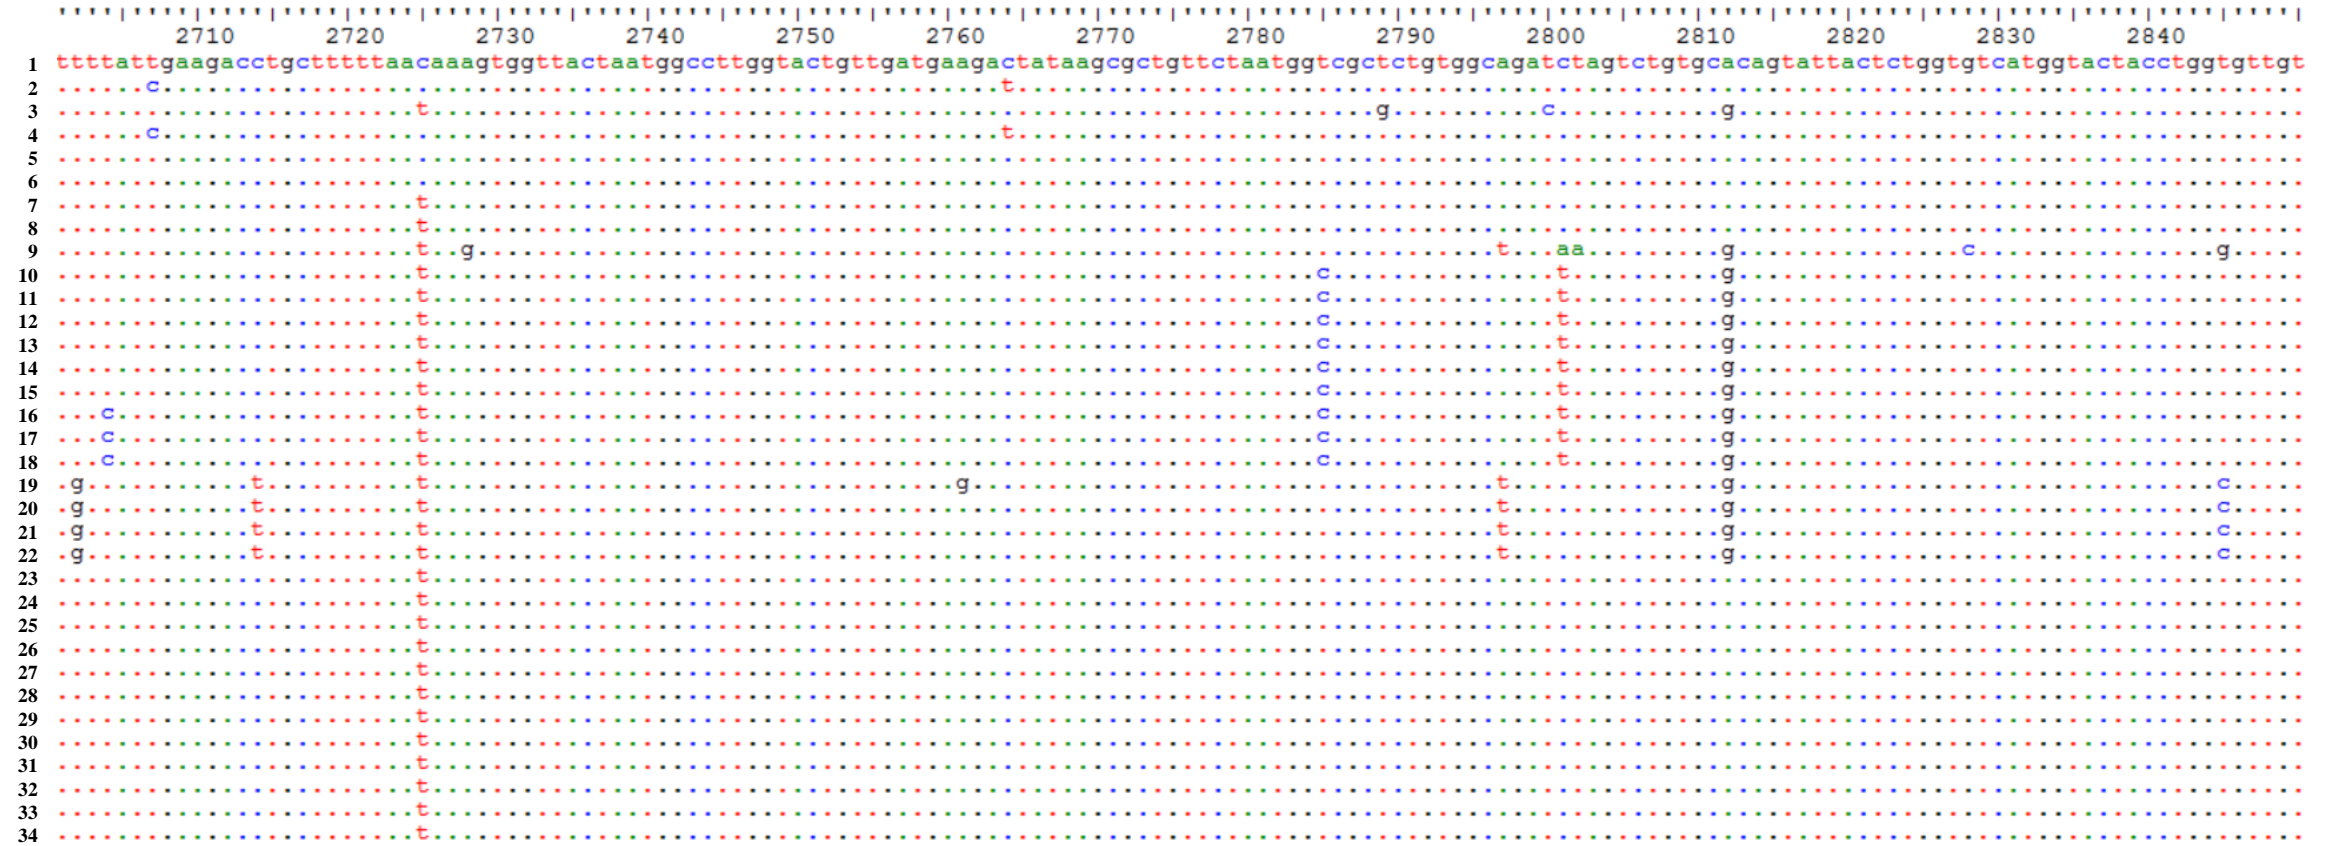





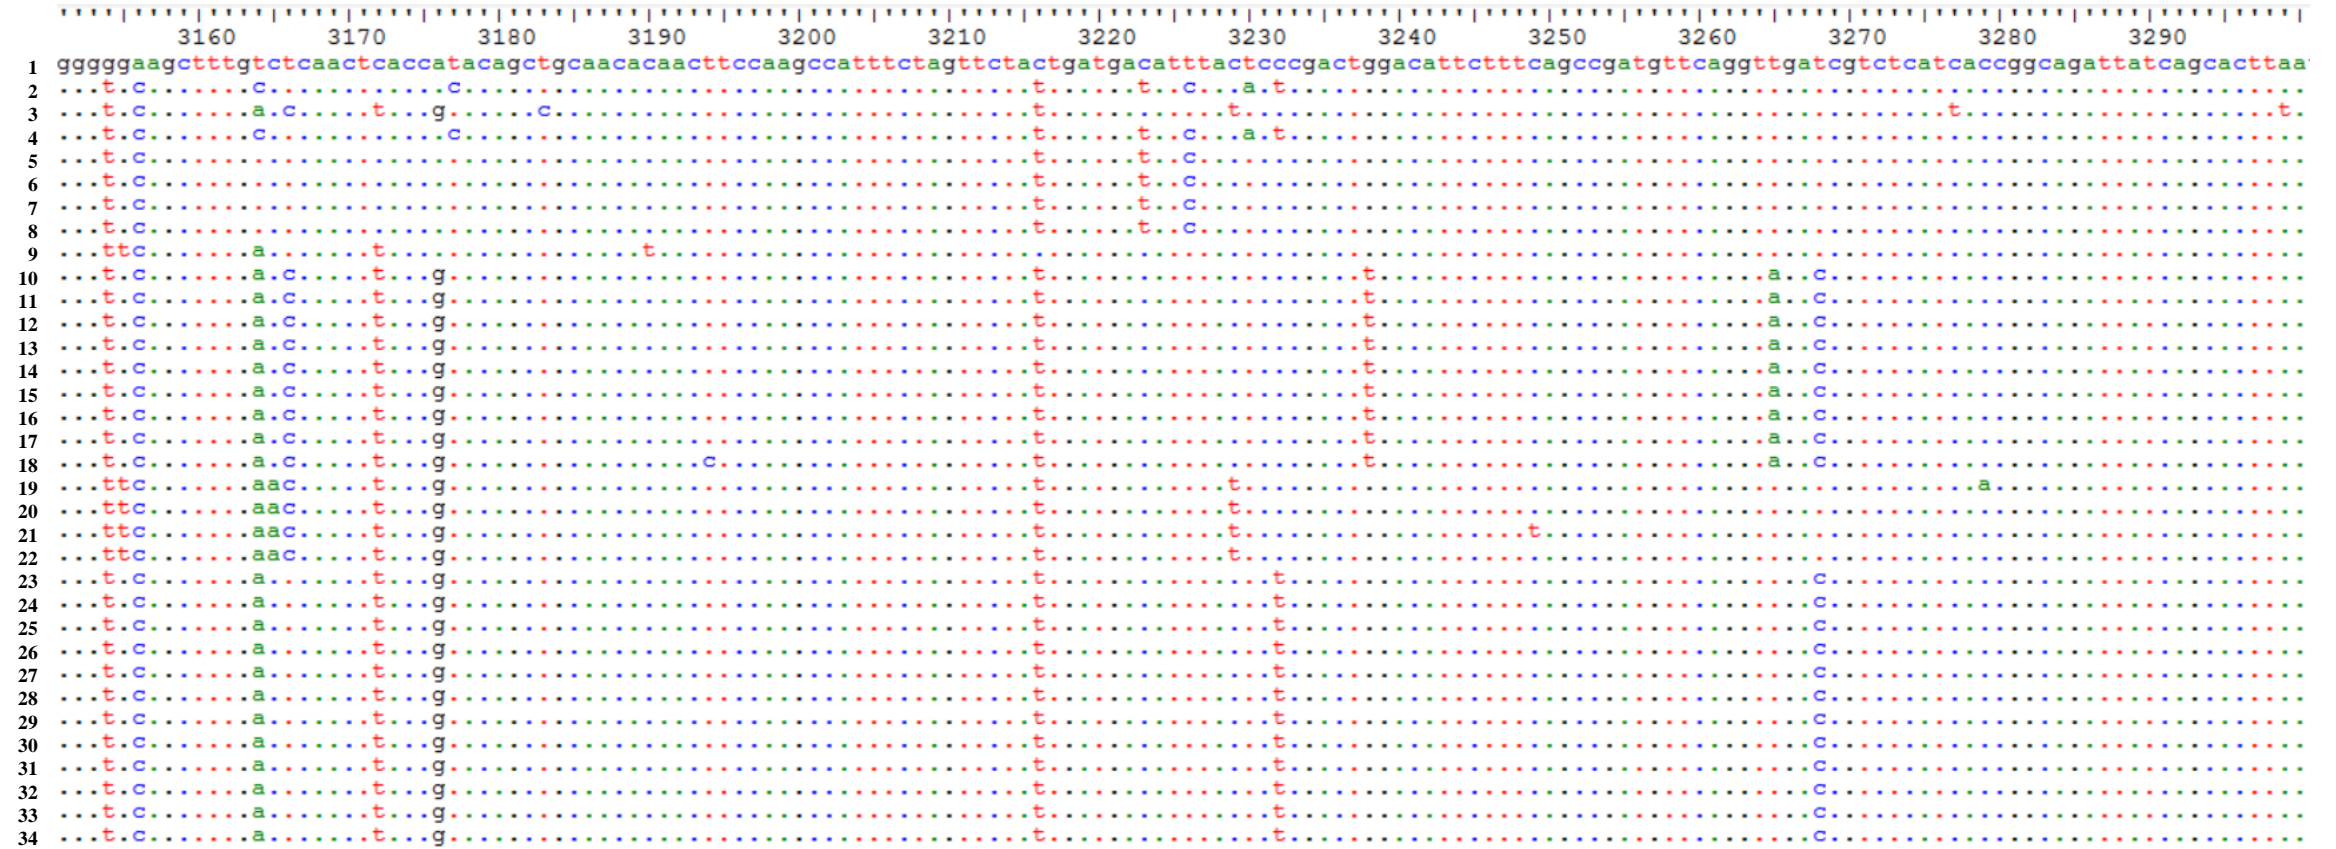

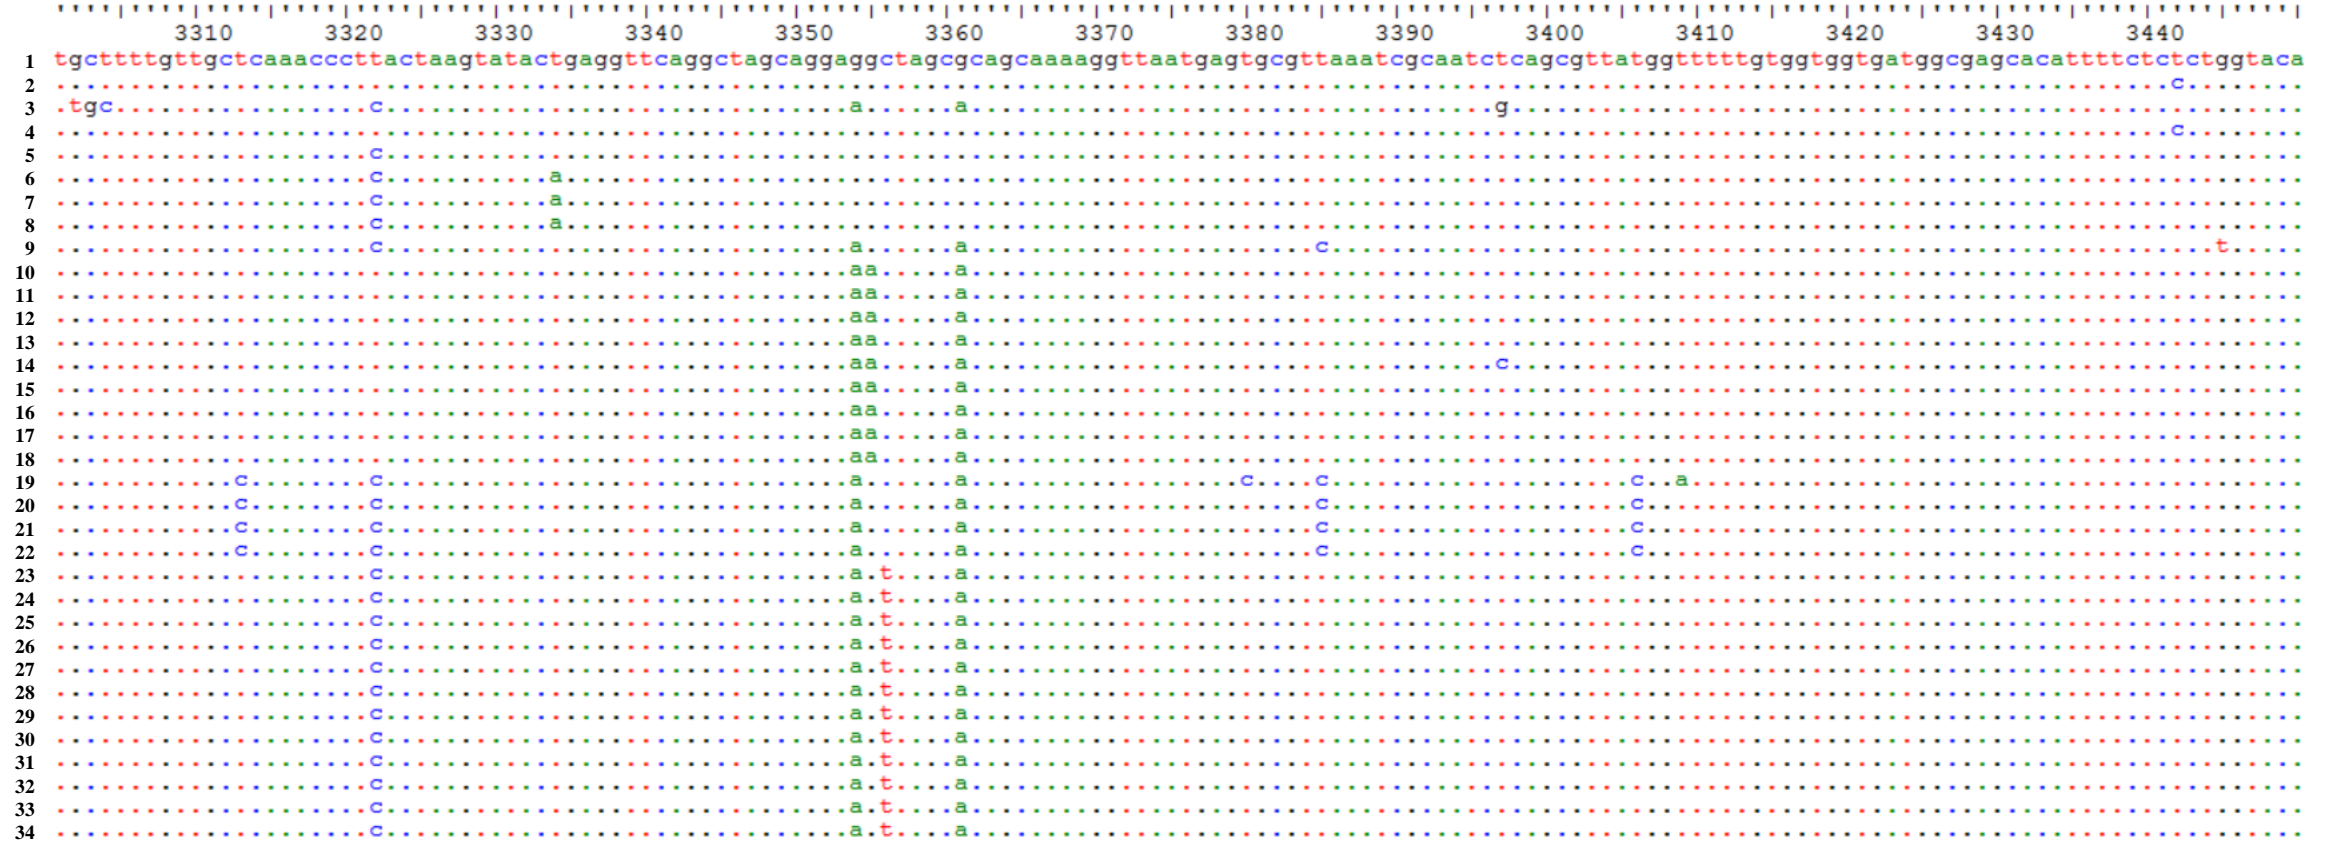

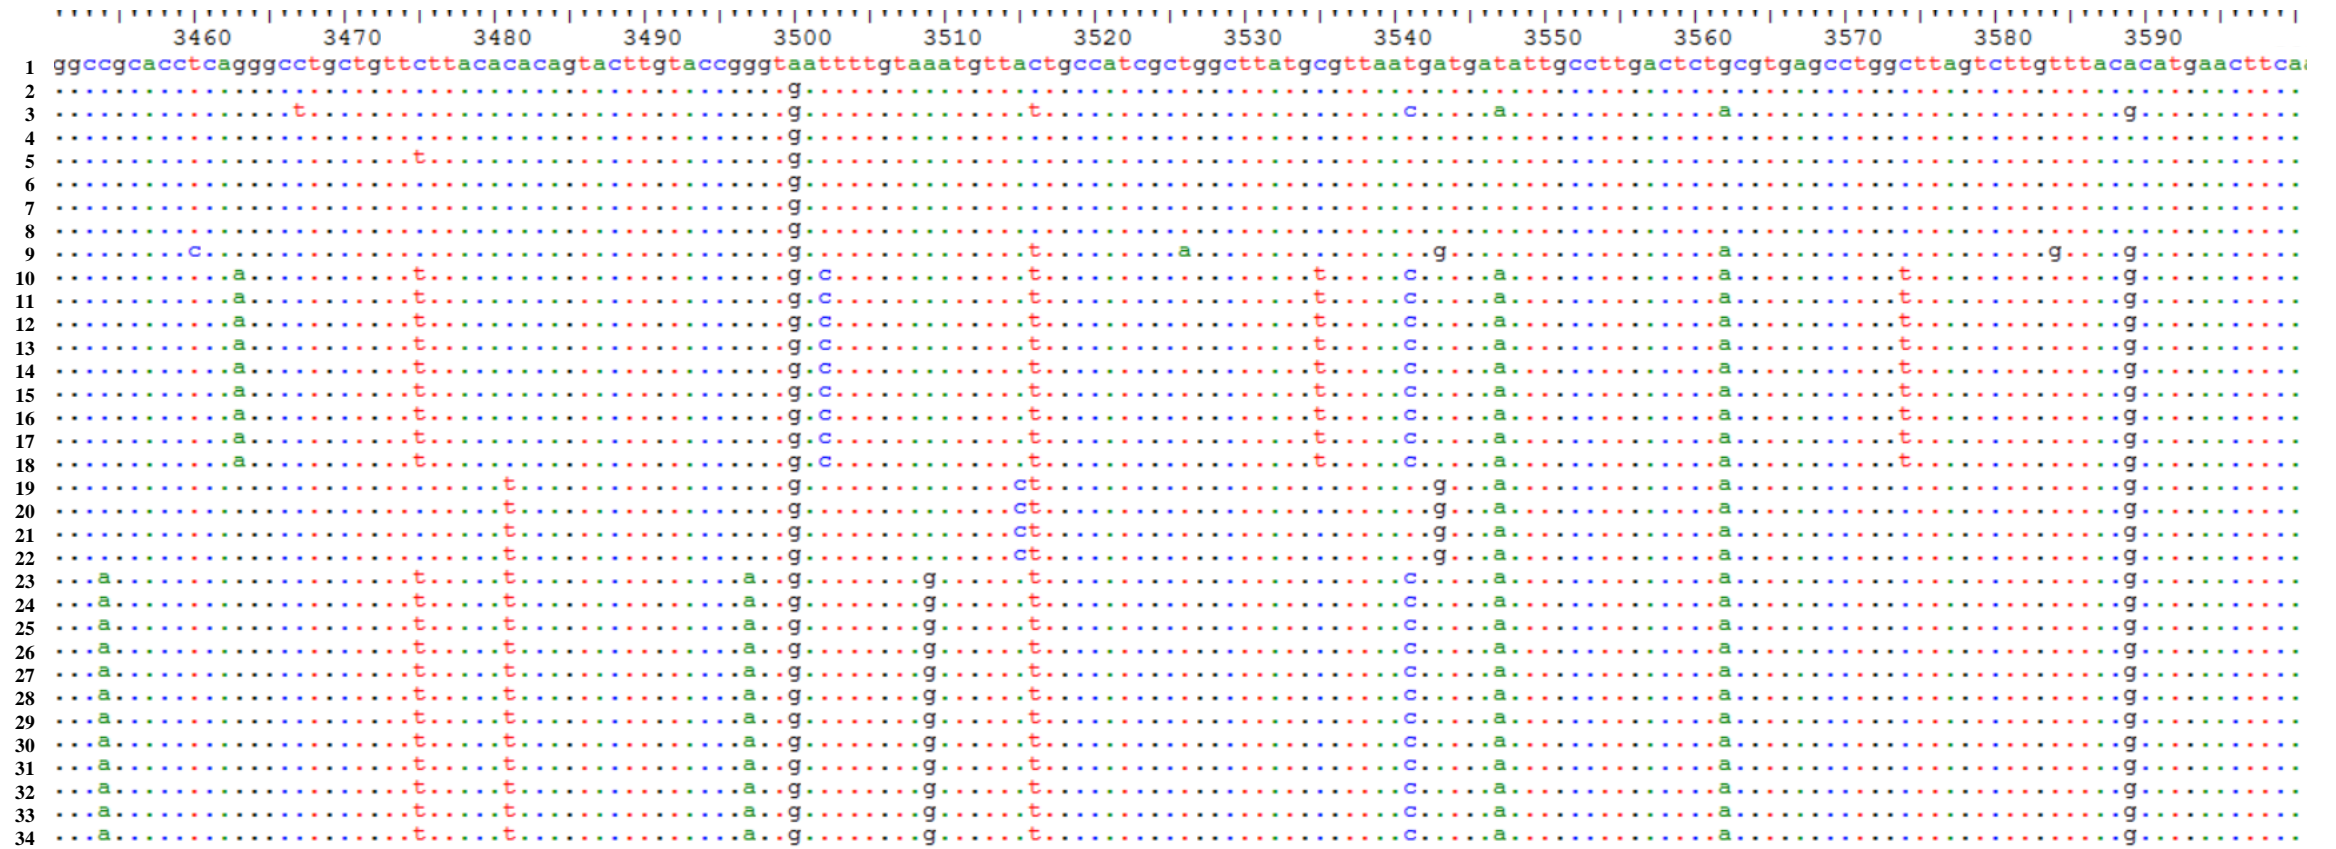



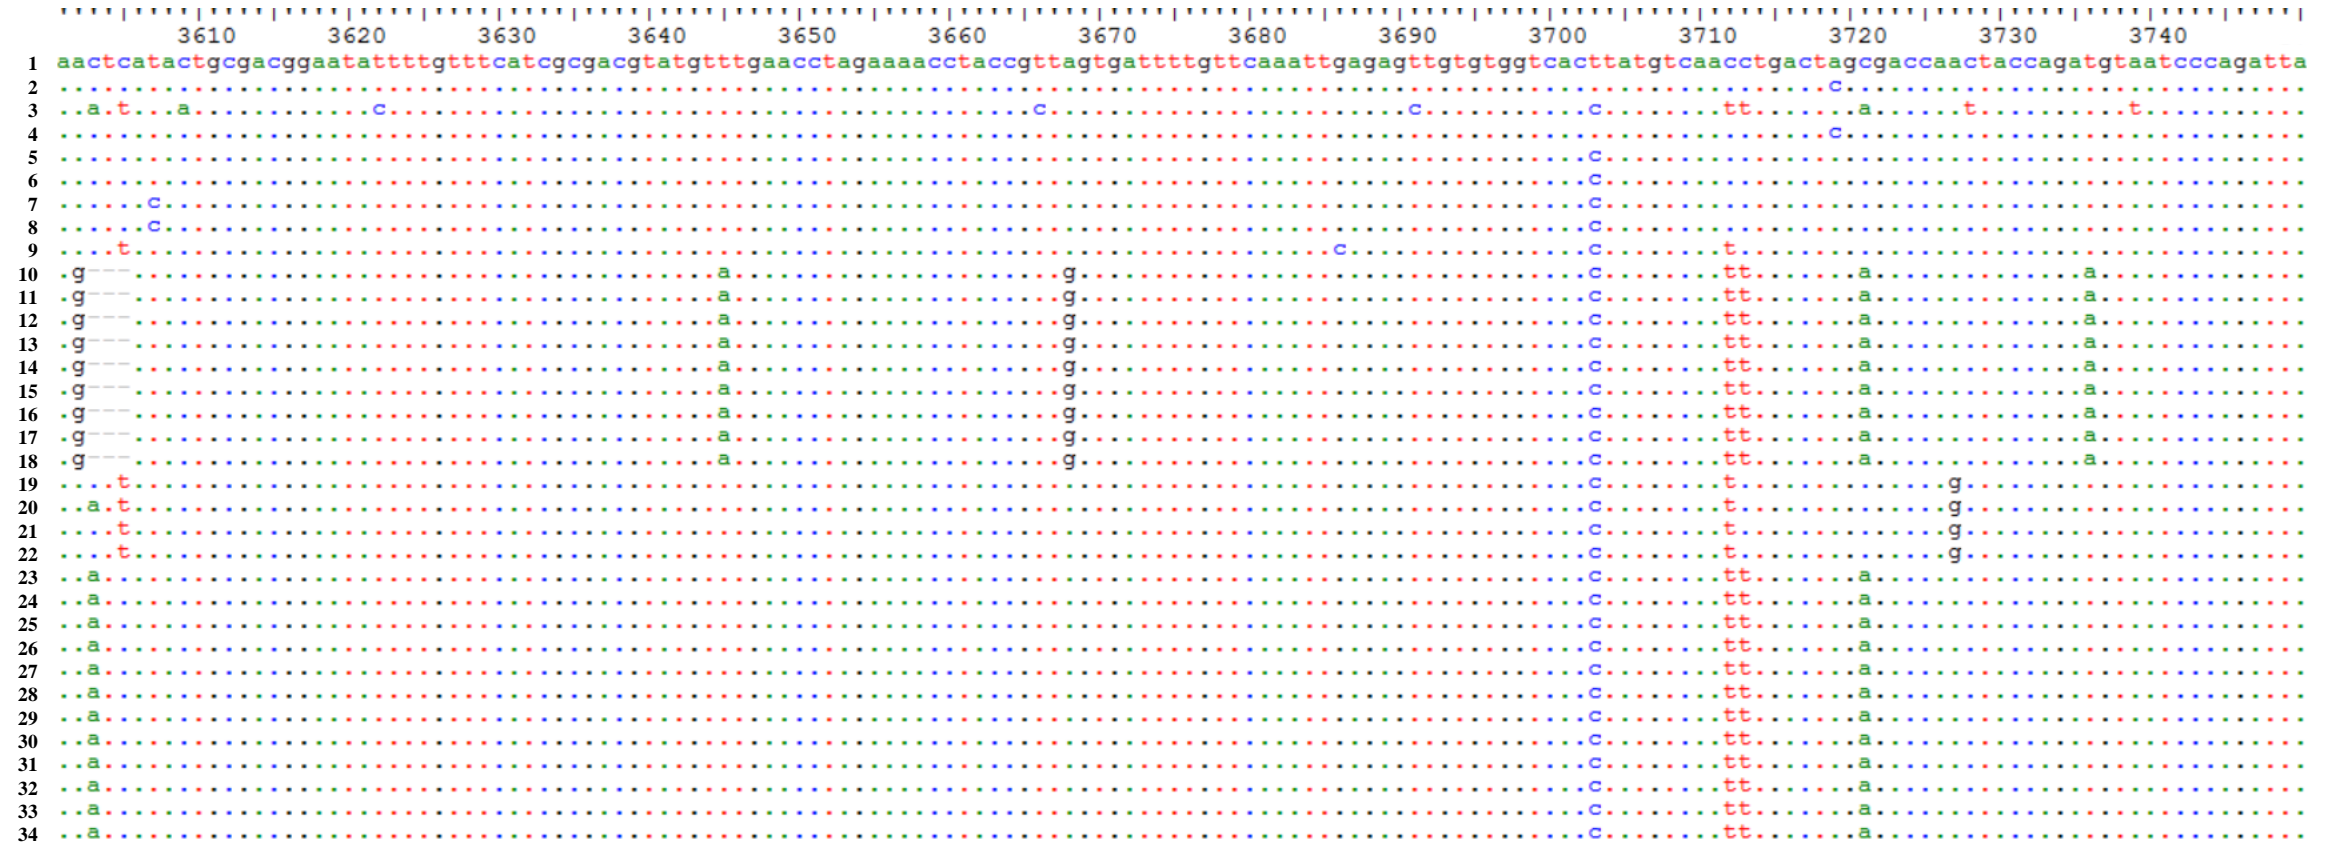

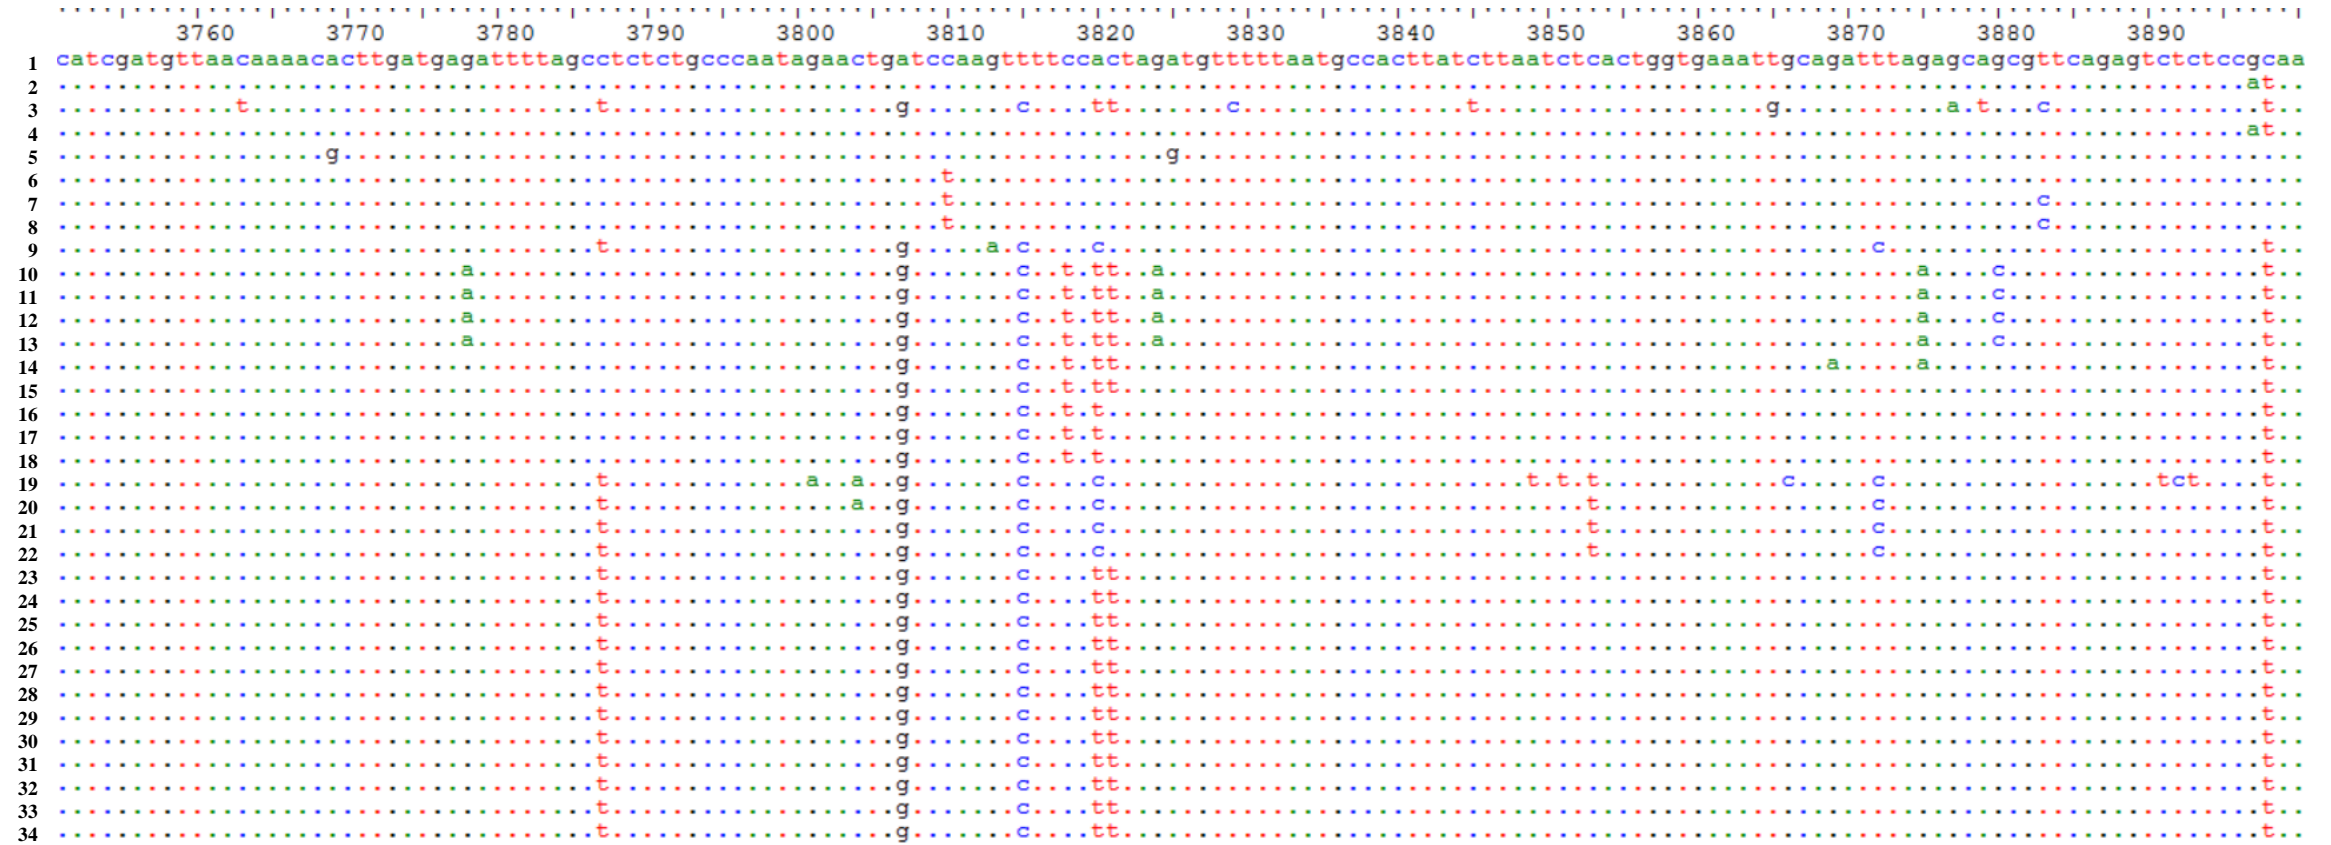

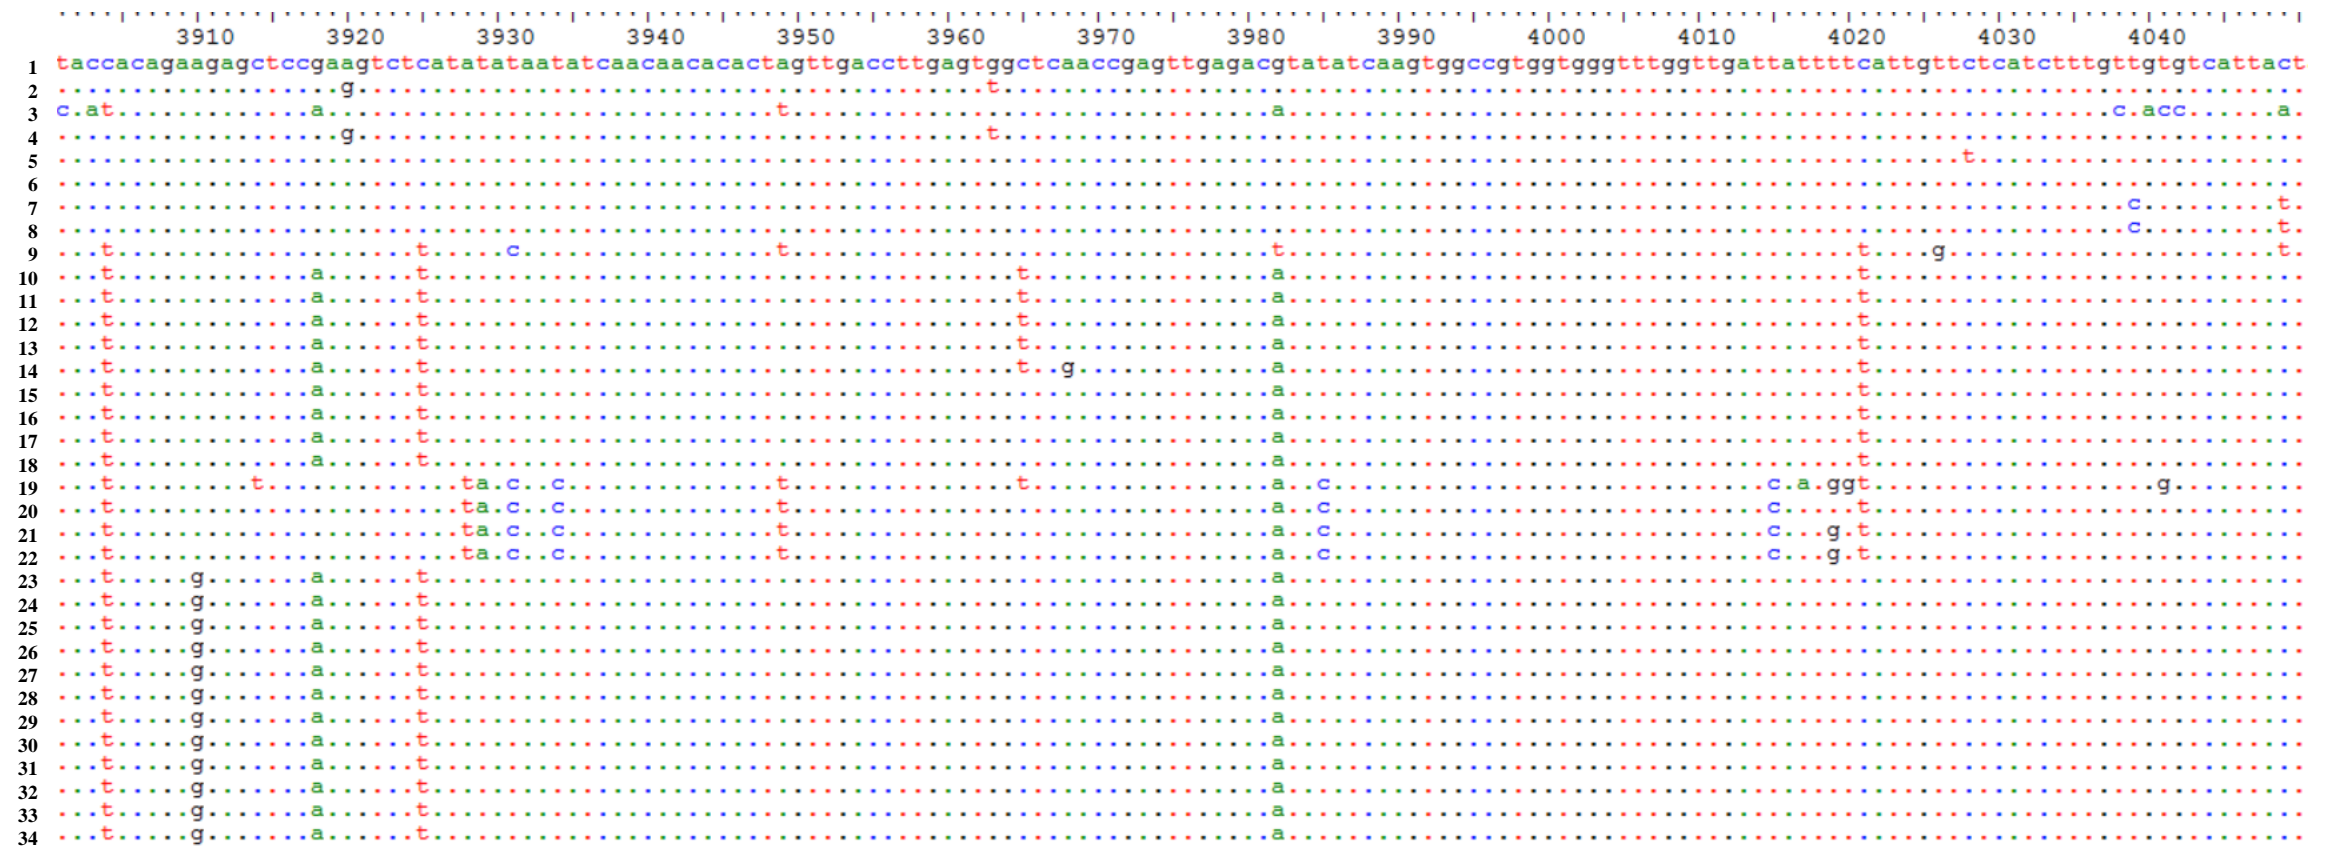



1. TH1 NPPED0108 KC764953
2. TH1 P1314-VCF-071401A KX981897
3. TH2 PXX08-SPF-020801A KY000559
4. TH2 P1414-SPF-071403A KX981898
5. Korea KNU-0902 GU180145
6. Korea KDGG10YO KJ857466
7. China CNU-091222-01 JN184634
8. China CNU-091222-02 JN184635
9. TH3 PXX11-SBF-021102A KX981899
10. TH4 CBR1 KR610993
11. Vietnam VN/JFP1013\_1/2013/Vinh KJ960178
12. TH4 CBR2 KR610994
13. Vietnam VN/VAP1113\_1/2013/Vung KJ960179
14. Vietnam VN/KCHY-310113/2013/KhoaiChau KJ960180
15. China CH/GXNN/2012 JX018179
16. China GDU KU985230
17. China GD-A JX112709
18. China GD-1 JX647847
19. TH5 EAS1 KR610991
20. Korea DR13 DQ862099
21. UK Br1/87 Z25483
22. Belgium CV777 AF353511
23. TH6 P1915-NPF-071511A KX981900
24. Japan NIG-1/JPN/2014 LC063830
25. Japan GNM-2/JPN/2014 LC063829
26. USA USA/Ohio75/2013 KJ645670
27. USA USA/Ohio69/2013 KJ645665
28. USA USA/Ohio60/2013 KJ645657
29. Japan MIE-1/JPN/2014 LC063827
30. Korea KUIDL-PED-2014-002 KJ588063
31. Korea KUIDL-PED-2014-007 KJ588062
32. USA USA/Indiana/17846/2013 KF452323
33. USA ISU13-19338E-IN-homogenate KF650370
34. USA PC21A KR078299
