# Supplementary material
Source: PubMed Central journal article supplement (PMC7185621)
Supplement: mmc3.pdf [file mmc3.pdf]

Korea\_KJ588062\_KUIDL-PED-2014-007\_100toTH6  
USA\_KJ645689\_USA/Ilinois972013  
Japan\_LC063829\_GNM-2/JPN2014\_100toTH6  
Japan\_LC063827\_MIE-1/JPN2014\_100toTH6  
USA\_KF468752\_MN  
USA\_KJ645693\_USA/Missouri022013  
Japan\_LC063830\_NIS-1/JPN2014\_100toTH6  
USA\_KF804028\_USA/Iowa/18984/2013  
TH6\_P1915-NPF-071511A  
Korea\_KJ588063\_KUIDL-PED-2014-002\_100toTH6  
USA\_KF468754\_IA/2013/Iowa  
USA\_KJ645695\_USA/Ohio69/2013\_100toTH6  
USA\_KF650373\_ISU13-22038-IA-homo  
USA\_KJ645670\_USA/Ohio75/2013\_100toTH6  
USA\_KJ645657\_USA/Ohio60/2013\_100toTH6  
USA\_KF650370\_ISU13-19338E-IN-homogenate\_100toTH6  
USA\_KF452323\_USA/Indiana/17846/2013  
USA\_KF452322\_USA/Iowa/16465/2013  
USA\_KF452323\_USA/Indiana/17846/2013\_100toTH6  
USA\_KR078299\_PC21A\_100toTH6  
USA\_KJ645706\_USA/Minnesota71/2013  
Korea\_KR873431\_KNU-141112-feces  
Korea\_KJ741221\_KNU-1409-1  
Korea\_KJ451048\_KNU-1402\_01\_2014  
Korea\_KJ451046\_KNU-1311\_12\_2013  
Korea\_KJ451039\_KNU-1304  
Korea\_KJ451045\_KNU-1310  
Korea\_KJ451047\_KNU-1401  
Korea\_KJ451042\_KNU-1307  
Korea\_KJ451044\_KNS-1309  
Korea\_KJ451043\_KNU-1308  
Korea\_KJ451038\_KNU-1303  
Korea\_KJ451040\_KNU-1305  
Korea\_KJ451041\_KNU-1306\_12\_2013  
USA\_KJ645697\_USA/Texas/28/2013  
USA\_KF729220\_USA/Colorado/2013  
USA\_KF468753\_IA/12013/Iowa  
USA\_KJ645701\_USA/Kansas125/2014  
China\_KC196276\_CHZMDZY/11  
China\_KF840547\_JXZS-3L  
China\_KF840548\_JXZS-1223L  
China\_KF840561\_CHJUSZL-S2/2013  
China\_KF840562\_CHJUSZL-N2  
China\_KF840549\_CHSDZD-1/2012  
China\_KF840550\_CHSDZD-2/2012  
China\_KF840539\_CHZJJS-Z/2012  
China\_JX501322\_CHXCH/2  
China\_KC210145\_AH2012  
China\_JX501321\_CH/TY/12  
China\_JN825712\_BJ-2011-1  
China\_JX088695\_GD-B  
China\_KF840546\_CHZJJS-Z/2012  
Korea\_KJ657475\_KDJN12YG  
China\_KC210147\_JS-H23012  
China\_KF840537\_CHZJXC-1/2012  
China\_KF840544\_CHZJZHY-6/2013  
China\_JX070671\_CH/FJXM-1/2012  
China\_JX524137\_ZJCZ4  
China\_KC140102\_FJZZ-9/2012  
China\_JX189454\_AJ1102  
China\_JX489155\_LC  
TH4\_KR610994\_CBR2  
Vietnam\_KJ960179\_VN/VAP/1113\_99toTH4  
Vietnam\_KJ960180\_VN/KCHY-310113\_99toTH4  
TH4\_KR610993\_CBR1  
Vietnam\_KJ960178\_VN/JFP1013\_99toTH4  
China\_JX018179\_CH/GXNN/2012\_99toTH4  
China\_KF384500\_CH/GDGZ/2012  
China\_JN980698\_CHGD-01  
China\_KF765609\_FL2013  
China\_KJ685230\_GDU\_99toTH4  
China\_JX112709\_GD-A\_99toTH4  
China\_JX647847\_GD-1\_99toTH4  
TH2\_X45RWVCF071201A  
TH2\_X45RWVCF071202A  
TH2\_KF724935\_4-5RW-VCF0712  
TH2\_KF724937\_22-53AG02011  
TH2\_KF724936\_1-5SST0412  
TH2\_KF724938\_6-56ST0413  
TH2\_P1414-SPF-071403A  
TH2\_P1414-SPF-071404A  
TH2\_PXX14-SBF-091402A  
TH2\_PXX14-SBF-091401A  
TH2\_PXX08-SPF-020801A  
TH2\_PXX08-SPF-020802A  
TH2\_KC764954\_PED0212-1  
TH2\_KC764955\_PED0210-2  
TH2\_KC764957\_SBPED0211-2  
TH2\_KC764958\_SBPED0212-1  
TH2\_KC764959\_SBPED0211-3  
TH2\_KC764960\_SBPED0212-2  
TH2\_KC764956\_SBPED0211-1  
TH2\_PXX14-SBF-011402A  
TH2\_PXX14-SBF-011404A  
TH2\_PXX14-SBF-011401A  
TH2\_P0214-SPF-011401A  
TH2\_P0214-SPF-011402A  
TH2\_P0114-DT2-011402A  
TH2\_P0114-DT2-011401A  
TH2\_P0114-DTS-011403A  
TH2\_P0114-DTS-011404A  
TH2\_X1356SRF121301A  
TH2\_X1356SRF121302A  
Korea\_JN184634\_CNU-091222-01\_98toTH1and2  
Korea\_JN184635\_CNU-091222-02\_98toTH1and2  
Korea\_KF79469\_MF3809  
Korea\_KJ857466\_KDC31OYO\_98toTH1and2  
Korea\_GU180145\_KNU-0902\_98toTH1and2  
TH1\_KC764953\_NPPED0108  
TH1\_KC764952\_NPPED2008  
TH1\_P2615-MA2-121501A  
TH1\_P2615-MA2-121501B  
TH1\_P2715-JPF-121501A  
TH1\_P2515-DT1-121501A  
TH1\_P2515-DT1-121501B  
TH1\_P2415-NTF-121501A  
TH1\_P2415-NTF-121501C  
TH1\_P2415-NTF-121501B  
TH1\_P2415-NTF-121502A  
TH1\_P2615-MA2-121502B  
TH1\_P2615-MA2-121502A  
TH1\_P2715-JPF-121501B  
TH1\_P2015-DT1-081501A  
TH1\_P2015-DT1-081501C  
TH1\_P2015-DT1-081501B  
TH1\_P1815-JPF-071501C  
TH1\_P1815-JPF-071501A  
TH1\_P1815-JPF-071501B  
TH1\_P1915-NPF-071501A  
TH1\_P0815-DT2-021503A  
TH1\_P0815-DT2-021504A  
TH1\_P0915-RMC-031501A  
TH1\_P0915-RMC-031501B  
TH1\_P0815-DT2-021503B  
TH1\_P0815-DT2-021504B  
TH1\_P1715-CPF-051501A  
TH1\_P1715-CPF-051501B  
TH1\_P1715-CPF-051502A  
TH1\_P1715-CPF-051502B  
TH1\_P0415-STF-011501B  
TH1\_P0415-STF-011501C  
TH1\_P0415-STF-011501A  
TH1\_P0615-STF-021521A  
TH1\_P2015-DT1-081511A  
TH1\_P0615-STF-021502A  
TH1\_P0615-STF-021502B  
TH1\_P0415-STF-011501D  
TH1\_P0415-STF-011501E  
TH1\_P0415-STF-011501F  
TH1\_P0115-PPS-011531A  
TH1\_P0115-PPS-011531B  
TH1\_P0115-PPS-011521A  
TH1\_P0115-PPS-011502A  
TH1\_P0115-PPS-011503A  
TH1\_P1014-JK1-041401A  
TH1\_P1014-JK1-041402A  
TH1\_P1214-MFD-061401A  
TH1\_P2114-CKF-111401A  
TH1\_P1314-VCF-071410B  
TH1\_P1314-VCF-071409B  
TH1\_P1314-VCF-071403B  
TH1\_P1314-VCF-071401A  
TH1\_P1414-SPF-071401A  
TH1\_P1314-VCF-071404A  
TH1\_PXX14-STF-071404A  
TH1\_P1414-SPF-071401B  
TH1\_PXX14-STF-071401A  
TH1\_P1314-VCF-071403A  
TH1\_P1314-VCF-071409A  
TH1\_P1314-VCF-071410A  
TH1\_PXX14-SRF-071401A  
TH1\_PXX14-TRF-071405A  
TH1\_PXX14-STF-071416A  
TH1\_PXX14-VTF-071406A  
TH1\_P1314-VCF-071407A  
TH1\_PXX14-DT2-071412A  
TH1\_PXX14-PKF-071401A  
TH1\_P1514-VCF-071401A  
TH1\_P1514-VCF-071403A  
TH1\_P1314-VCF-071407B  
TH1\_P1314-VCF-071412A  
TH1\_P1314-VCF-071406A  
TH1\_P1514-VCF-071404A  
TH1\_P1314-VCF-071405A  
TH1\_P1514-VCF-071402A  
TH3\_PXX11-SBF-021102A  
Korea\_GU180143\_KNU-0802  
Korea\_GU180146\_KNU-0903  
Korea\_GU180148\_KNU-0905  
Korea\_KJ451036\_KNU-1301  
Korea\_KJ451037\_KNU-1302  
TH5\_KR610991\_EAS1  
TH5\_KR610992\_EAS2  
THX\_Vaccine-virus  
Korea\_GU937797\_SM98  
THX\_LC053455\_AVCT12  
Korea\_DO862099\_DR13\_99toTH5  
Belgium\_AF353511\_PEDV\_CV777\_99toTH5  
China\_EF185992\_LZC  
UK\_Z25493\_BR187\_99toTH5  
Korea\_JQ023161\_DR13  
Japan\_AB548618\_83P-5\_Atenuated  
China\_KC109141\_JS2008  
China\_JX560761\_SD-M  
China\_JN547229\_CHFS\_MM\_1986  
China\_DO86739\_LI803\_MM\_2006  
China\_EU031893\_DX\_MM\_2007  
China\_AY653204\_JS-2004-2\_2004  
China\_JQ638923\_CH/JLGLZ/2011  
China\_JX242462\_CH/HKC-08-2011  
China\_KC787539\_CH/GMB-02-2013  
China\_KC787543\_CH/STC-12-2012  
China\_JX070672\_CH/FJXM-2/2012  
Germany\_LM645057\_L00721/GER/2014  
Germany\_LM645058\_GER/L00719/2014  
Belgium\_KR003452\_15V010/BEL/2015  
France\_KR011756\_FR/001/2014  
Korea\_KM003155\_KNU-1406-1  
USA\_KJ399978\_OH851  
USA\_KJ645635\_Indiana12.83/2013  
USA\_KJ645702\_USA/Ohio126/2014  
Korea\_GU180147\_KNU-0904  
Korea\_GU180144\_KNU-0901  
Korea\_AV167585\_Chinj/99  
Korea\_AF500215\_Spk1  
Korea\_GU180142\_KNU-0801
